# Supplementary material for: INHBA+ Macrophages and Pro-inflammatory CAFs are Associated with Distinctive Immunosuppressive Tumor Microenvironment in Submucous Fibrosis-Derived Oral Squamous Cell Carcinoma
Source: Research Square preprint supplement (doi:10.21203/rs.3.rs-6079144/v1), 2025-04-15
Supplement: Supplementary file 1 [file 71f4bee7e9fcbdc2bb93aa0e.xlsx]

## Sheet: Allmakers-caf-分组
Characteristic Gene of CAF in ODSCC
p_val	avg_log2FC	pct.1	pct.2	p_val_adj	cluster	gene
1.05269e-36	-2.02521	0.214	0.503	3.08028e-32	NODSCC	TDO2
9.93161e-29	-0.754554	0.759	0.91	2.90609e-24	NODSCC	LUM
7.39345e-22	-0.70931	0.773	0.885	2.1634e-17	NODSCC	DCN
3.76253e-16	-1.91878	0.139	0.298	1.10096e-11	NODSCC	DUSP4
6.58116e-13	-0.695242	0.408	0.608	1.92571e-08	NODSCC	COL7A1
3.29205e-10	-0.554209	0.699	0.791	9.63286e-06	NODSCC	CTSK
8.18787e-10	-0.488225	0.518	0.693	2.39585e-05	NODSCC	WNT5A
0.000119006	-0.354635	0.512	0.62	1	NODSCC	INHBA
1.05269e-36	2.02521	0.503	0.214	3.08028e-32	ODSCC	TDO2
9.93161e-29	0.754554	0.91	0.759	2.90609e-24	ODSCC	LUM
7.39345e-22	0.70931	0.885	0.773	2.1634e-17	ODSCC	DCN
3.76253e-16	1.91878	0.298	0.139	1.10096e-11	ODSCC	DUSP4
6.58116e-13	0.695242	0.608	0.408	1.92571e-08	ODSCC	COL7A1
3.29205e-10	0.554209	0.791	0.699	9.63286e-06	ODSCC	CTSK
8.18787e-10	0.488225	0.693	0.518	2.39585e-05	ODSCC	WNT5A
0.000119006	0.354635	0.62	0.512	1	ODSCC	INHBA
