# Supplementary material for: INHBA+ Macrophages and Pro-inflammatory CAFs are Associated with Distinctive Immunosuppressive Tumor Microenvironment in Submucous Fibrosis-Derived Oral Squamous Cell Carcinoma
Source: Research Square preprint supplement (doi:10.21203/rs.3.rs-6079144/v1), 2025-04-15
Supplement: Supplementary file 2 [file b4b577a188a4b6d0cdcfca58.xlsx]

## Sheet: INHBA 
Expression level of INHBA
celltype	t_statistic	df	p_value	conf_low	conf_high	mean_diff	adj_pvalue
scRNA_Bcell	0.346329	271.976	0.729364	-0.0267027	0.038103	0.00570016	0.833558
scRNA_Endo	0.149691	213.816	0.88115	-0.0428508	0.0498941	0.00352161	0.88115
scRNA_Epith	-11.1081	9386.74	1.72462e-28	-0.190682	-0.133478	-0.16208	1.37969e-27
scRNA_CAF	-3.71404	973.318	0.000215569	-0.310722	-0.0958827	-0.203302	0.000431139
scRNA_Mast	0.81846	93.4352	0.415177	-0.0438616	0.105373	0.030756	0.553569
scRNA_Myeloid	-9.10558	1560.63	2.55071e-19	-0.588882	-0.380139	-0.48451	1.02028e-18
scRNA_Plasma	-1.91199	1549.96	0.0560619	-0.0622093	0.000795106	-0.0307071	0.0896991
scRNA_Tcell	-5.78676	4551.39	7.65695e-09	-0.0465388	-0.022985	-0.0347619	2.04185e-08

## Sheet: TGF
Expression level of TGFβ superfamily members in two groups
gene	t	df	p-value	95% CI		mean in group NODSCC	mean in group ODSCC
INHA	-0.63049	18399	0.5284	-0.000323092	0.000165826	0.000214657	0.00029329
INHBA	-2.8456	17877	0.004437	-0.0463964	-0.00854931	0.271886	0.299359
INHBB	7.9223	29690	2.412e-15	0.00728907	0.0120815	0.0138337	0.0041484
INHBC	0.70852	27586	0.4786	-0.000247882	0.000528542	0.000276564	0.000136234
INHBE	1.7447	26622	0.08105	-4.19112e-05	0.000720951	0.00048502	0.0001455
NODAL	-0.41007	14236	0.6818	-0.000563139	0.00036828	0.00014451	0.000241939
TDGF1	0.30899	22260	0.7573	-0.000338616	0.000465356	0.000376344	0.000312974
TGFβ1	19.876	22511	2.2e-16	0.175388	0.213765	0.654043	0.459466
TGFβ2	-0.65943	18858	0.5096	-0.00518949	0.00257673	0.0227413	0.0240477
TGFβ3	-1.9631	17106	0.04965	-0.0109081	-8.24217e-06	0.0323454	0.0378036
