# Supplementary material for: INHBA+ Macrophages and Pro-inflammatory CAFs are Associated with Distinctive Immunosuppressive Tumor Microenvironment in Submucous Fibrosis-Derived Oral Squamous Cell Carcinoma
Source: Research Square preprint supplement (doi:10.21203/rs.3.rs-6079144/v1), 2025-04-15
Supplement: Supplementary file 3 [file bd279a02e7b617d53edb0303.xlsx]

## Sheet: Allmakers
DEGs of Macrophages
Gene	p_val	avg_log2FC	pct.1	pct.2	p_val_adj	celltype
RPL41	5.32577e-22	0.729974	0.919	0.984	1.55837e-17	S100A2_Mac
RPLP1	8.35043e-20	0.798753	0.907	0.976	2.44342e-15	S100A2_Mac
RPS29	2.23395e-19	0.962659	0.791	0.928	6.53676e-15	S100A2_Mac
RPS2	7.26046e-19	0.825102	0.85	0.945	2.12448e-14	S100A2_Mac
RPS18	6.25814e-18	0.871373	0.822	0.942	1.83119e-13	S100A2_Mac
RPL11	5.49535e-15	0.765823	0.798	0.927	1.60799e-10	S100A2_Mac
PTMA	8.60937e-15	0.600147	0.866	0.969	2.51919e-10	S100A2_Mac
TMSB10	2.39739e-14	0.665461	0.963	0.993	7.01501e-10	S100A2_Mac
RPL32	3.21959e-14	0.818505	0.791	0.918	9.42086e-10	S100A2_Mac
RPS27	2.56712e-13	0.682277	0.816	0.958	7.51166e-09	S100A2_Mac
ATP5F1E	4.82434e-13	0.748788	0.826	0.961	1.41165e-08	S100A2_Mac
RPS28	1.31622e-12	0.73813	0.819	0.958	3.85139e-08	S100A2_Mac
RPL21	1.52371e-12	0.764649	0.782	0.929	4.45852e-08	S100A2_Mac
RPS15	3.0754e-12	0.747595	0.779	0.924	8.99893e-08	S100A2_Mac
RPL37A	5.44049e-12	0.931274	0.754	0.913	1.59194e-07	S100A2_Mac
RPL19	9.2624e-12	0.866535	0.757	0.912	2.71027e-07	S100A2_Mac
CSTA	1.22874e-11	0.615031	0.156	0.389	3.5954e-07	S100A2_Mac
LAMTOR2	3.82735e-11	0.795974	0.259	0.549	1.11992e-06	S100A2_Mac
IFI27L2	1.0121e-10	0.755493	0.202	0.454	2.96152e-06	S100A2_Mac
RPS12	2.64841e-10	0.699079	0.816	0.951	7.74951e-06	S100A2_Mac
RPL13A	2.68397e-10	0.722729	0.738	0.913	7.85357e-06	S100A2_Mac
AKR1A1	2.71682e-10	0.608062	0.262	0.541	7.94968e-06	S100A2_Mac
VPS28	2.97226e-10	0.674064	0.24	0.499	8.69712e-06	S100A2_Mac
HADHB	3.74121e-10	0.693169	0.168	0.385	1.09472e-05	S100A2_Mac
RPS27A	1.39683e-09	0.647313	0.766	0.939	4.08728e-05	S100A2_Mac
FUOM	1.78605e-09	0.708388	0.156	0.362	5.22616e-05	S100A2_Mac
MRPL41	2.4395e-09	0.768135	0.19	0.41	7.13821e-05	S100A2_Mac
SRI	3.52861e-09	0.618494	0.184	0.39	0.000103251	S100A2_Mac
TNFSF12	4.24817e-09	0.64733	0.143	0.334	0.000124306	S100A2_Mac
TARS	6.11905e-09	0.602325	0.118	0.29	0.00017905	S100A2_Mac
COX16	6.47055e-09	0.645771	0.199	0.416	0.000189335	S100A2_Mac
MRPL20	8.27868e-09	0.796839	0.249	0.482	0.000242242	S100A2_Mac
MRPL52	1.06463e-08	0.725614	0.237	0.465	0.000311523	S100A2_Mac
IDH2	1.24114e-08	0.618191	0.212	0.43	0.00036317	S100A2_Mac
ATP5PO	1.25644e-08	0.613764	0.252	0.508	0.000367647	S100A2_Mac
RPL18A	1.26438e-08	0.76605	0.735	0.897	0.000369971	S100A2_Mac
CCT6A	1.32789e-08	0.689737	0.237	0.487	0.000388555	S100A2_Mac
RPS3A	1.40546e-08	0.783599	0.723	0.906	0.000411253	S100A2_Mac
RPS6	1.43477e-08	0.86386	0.735	0.9	0.000419827	S100A2_Mac
SETD3	1.67737e-08	0.694978	0.125	0.288	0.000490814	S100A2_Mac
PARL	1.74945e-08	0.606827	0.115	0.28	0.000511906	S100A2_Mac
REX1BD	1.87444e-08	0.73595	0.255	0.504	0.000548481	S100A2_Mac
VDAC2	1.99212e-08	0.605242	0.277	0.529	0.000582914	S100A2_Mac
PSMB10	2.02791e-08	0.643448	0.237	0.471	0.000593386	S100A2_Mac
RAB13	2.09263e-08	0.718504	0.193	0.395	0.000612324	S100A2_Mac
RTF2	2.28922e-08	0.624176	0.206	0.418	0.000669848	S100A2_Mac
NDUFB3	2.44715e-08	0.623518	0.28	0.529	0.000716061	S100A2_Mac
RNF7	2.50177e-08	0.680939	0.218	0.443	0.000732043	S100A2_Mac
ENSA	2.58414e-08	0.615575	0.206	0.421	0.000756144	S100A2_Mac
PSMB2	2.66321e-08	0.709427	0.265	0.504	0.000779283	S100A2_Mac
TCF12	2.69658e-08	0.6616	0.109	0.273	0.000789045	S100A2_Mac
RPL30	2.75117e-08	0.65066	0.782	0.938	0.000805021	S100A2_Mac
YWHAQ	2.77545e-08	0.752501	0.221	0.447	0.000812124	S100A2_Mac
PSMD4	4.03535e-08	0.667725	0.202	0.405	0.00118078	S100A2_Mac
NRBP1	4.04655e-08	0.677659	0.165	0.35	0.00118406	S100A2_Mac
MPC1	4.07934e-08	0.61218	0.174	0.359	0.00119366	S100A2_Mac
DPP9	4.37409e-08	0.626447	0.115	0.28	0.0012799	S100A2_Mac
NDUFS8	5.88013e-08	0.623482	0.199	0.391	0.00172058	S100A2_Mac
RPL37	6.04869e-08	0.69751	0.76	0.918	0.00176991	S100A2_Mac
NDUFA11	6.30736e-08	0.650431	0.305	0.594	0.0018456	S100A2_Mac
DSTN	7.13595e-08	0.769367	0.252	0.48	0.00208805	S100A2_Mac
CBX3	7.4074e-08	0.664864	0.271	0.514	0.00216748	S100A2_Mac
ZC3H13	7.79066e-08	0.780983	0.171	0.355	0.00227962	S100A2_Mac
CAMTA1	8.21867e-08	0.664476	0.199	0.398	0.00240486	S100A2_Mac
ECHS1	8.33181e-08	0.774636	0.159	0.33	0.00243797	S100A2_Mac
SMARCA2	8.4705e-08	0.62303	0.162	0.346	0.00247855	S100A2_Mac
UXT	9.85595e-08	0.725405	0.199	0.397	0.00288395	S100A2_Mac
DPY30	1.09913e-07	0.714027	0.146	0.312	0.00321617	S100A2_Mac
PRDX6	1.21372e-07	0.714644	0.29	0.548	0.00355146	S100A2_Mac
NDUFB5	1.2586e-07	0.903664	0.215	0.422	0.00368279	S100A2_Mac
SNRPB	1.41088e-07	0.65261	0.28	0.529	0.00412838	S100A2_Mac
SELENOW	1.41909e-07	0.618896	0.29	0.531	0.0041524	S100A2_Mac
HPCAL1	1.44773e-07	0.619013	0.121	0.282	0.00423619	S100A2_Mac
USF2	1.68828e-07	0.80974	0.218	0.416	0.00494008	S100A2_Mac
GLRX3	1.77001e-07	0.799402	0.143	0.311	0.00517921	S100A2_Mac
AP2B1	1.88783e-07	0.70909	0.162	0.338	0.00552398	S100A2_Mac
RPS23	1.96199e-07	0.670353	0.738	0.913	0.00574097	S100A2_Mac
TMEM160	2.08617e-07	0.613663	0.215	0.419	0.00610436	S100A2_Mac
RPS14	2.19563e-07	0.664797	0.785	0.931	0.00642463	S100A2_Mac
COA8	2.20546e-07	0.630362	0.106	0.252	0.00645339	S100A2_Mac
WIPF2	2.43507e-07	0.617762	0.125	0.267	0.00712527	S100A2_Mac
RPL26	2.59252e-07	0.65439	0.757	0.924	0.00758597	S100A2_Mac
EIF4E2	2.71803e-07	0.682945	0.168	0.345	0.00795322	S100A2_Mac
DBNDD2	2.79405e-07	0.87415	0.178	0.361	0.00817566	S100A2_Mac
RPL12	2.85867e-07	0.744435	0.713	0.924	0.00836475	S100A2_Mac
RALBP1	2.86276e-07	0.631391	0.202	0.395	0.00837671	S100A2_Mac
FBXO7	2.89323e-07	0.612623	0.156	0.322	0.00846587	S100A2_Mac
TMEM14C	2.9069e-07	0.694933	0.265	0.476	0.00850588	S100A2_Mac
MAGOH	2.98035e-07	0.712609	0.215	0.417	0.00872081	S100A2_Mac
SRP72	3.50955e-07	0.683353	0.196	0.379	0.0102693	S100A2_Mac
SNW1	3.55706e-07	0.634762	0.174	0.347	0.0104083	S100A2_Mac
YIPF3	3.5656e-07	0.633486	0.128	0.272	0.0104333	S100A2_Mac
MTCH1	3.60176e-07	0.714522	0.262	0.492	0.0105391	S100A2_Mac
CHCHD1	3.75139e-07	0.630916	0.178	0.346	0.010977	S100A2_Mac
CFDP1	3.91138e-07	0.91465	0.118	0.259	0.0114451	S100A2_Mac
UBE2L6	3.93672e-07	0.642295	0.268	0.488	0.0115192	S100A2_Mac
LTBR	3.9847e-07	0.663719	0.131	0.29	0.0116596	S100A2_Mac
MDH1	4.14338e-07	0.676939	0.24	0.457	0.012124	S100A2_Mac
NRAS	4.36082e-07	0.68297	0.137	0.29	0.0127602	S100A2_Mac
TKT	4.44364e-07	0.676073	0.271	0.5	0.0130025	S100A2_Mac
POLR2J	4.76703e-07	0.901473	0.156	0.32	0.0139488	S100A2_Mac
PET100	5.49514e-07	0.87688	0.246	0.475	0.0160793	S100A2_Mac
TXN2	5.86512e-07	0.633005	0.146	0.296	0.0171619	S100A2_Mac
CBR1	5.86843e-07	0.670272	0.131	0.283	0.0171716	S100A2_Mac
TERF2IP	6.26811e-07	0.698661	0.212	0.397	0.0183411	S100A2_Mac
RPL36	6.73007e-07	0.771611	0.741	0.928	0.0196929	S100A2_Mac
TFPT	6.82169e-07	0.753626	0.168	0.328	0.0199609	S100A2_Mac
STRAP	7.12973e-07	0.724631	0.15	0.312	0.0208623	S100A2_Mac
CCDC50	7.66006e-07	0.711683	0.143	0.297	0.0224141	S100A2_Mac
SZRD1	7.9589e-07	0.746424	0.19	0.366	0.0232885	S100A2_Mac
FGFR1OP2	8.20781e-07	0.657434	0.212	0.394	0.0240169	S100A2_Mac
RAB11A	8.98443e-07	0.930674	0.218	0.425	0.0262893	S100A2_Mac
NTAN1	9.80764e-07	0.862142	0.165	0.328	0.0286981	S100A2_Mac
PHB	9.83092e-07	0.618655	0.159	0.317	0.0287663	S100A2_Mac
G3BP2	9.95091e-07	0.779003	0.246	0.462	0.0291173	S100A2_Mac
MRPL54	1.01094e-06	0.732714	0.174	0.347	0.0295811	S100A2_Mac
METAP2	1.05073e-06	0.686975	0.199	0.384	0.0307455	S100A2_Mac
BECN1	1.06788e-06	0.835969	0.137	0.285	0.0312472	S100A2_Mac
NPL	1.10953e-06	0.816143	0.237	0.441	0.0324658	S100A2_Mac
SSU72	1.14363e-06	0.728224	0.237	0.436	0.0334638	S100A2_Mac
TCEAL4	1.15193e-06	0.81073	0.134	0.284	0.0337067	S100A2_Mac
EIF3G	1.16499e-06	0.826119	0.277	0.522	0.0340889	S100A2_Mac
SELENOH	1.17195e-06	0.717407	0.312	0.566	0.0342923	S100A2_Mac
NFIC	1.18531e-06	0.729041	0.171	0.337	0.0346834	S100A2_Mac
MICOS13	1.1944e-06	0.629621	0.19	0.357	0.0349493	S100A2_Mac
COX14	1.21975e-06	0.842544	0.196	0.381	0.035691	S100A2_Mac
C7orf50	1.255e-06	0.762151	0.162	0.323	0.0367225	S100A2_Mac
UBE2N	1.29392e-06	0.607334	0.206	0.391	0.0378615	S100A2_Mac
PSMD8	1.34699e-06	0.697047	0.287	0.516	0.0394144	S100A2_Mac
GUSB	1.38772e-06	0.630287	0.159	0.316	0.0406061	S100A2_Mac
PSMB5	1.40677e-06	0.743281	0.15	0.3	0.0411635	S100A2_Mac
GNG10	1.42412e-06	0.750794	0.346	0.624	0.0416713	S100A2_Mac
SSBP1	1.44454e-06	0.749141	0.271	0.509	0.0422687	S100A2_Mac
RPL17	1.57497e-06	0.654743	0.71	0.902	0.0460851	S100A2_Mac
RPL35	1.97104e-06	0.778701	0.695	0.903	0.0576746	S100A2_Mac
EIF6	2.09928e-06	0.708842	0.196	0.37	0.0614269	S100A2_Mac
RPL7A	2.12319e-06	0.955459	0.667	0.858	0.0621266	S100A2_Mac
MRPS21	2.14786e-06	0.797798	0.193	0.365	0.0628485	S100A2_Mac
NDUFA5	2.20908e-06	0.828742	0.19	0.357	0.06464	S100A2_Mac
PSMC4	2.45428e-06	0.766899	0.206	0.38	0.0718146	S100A2_Mac
CPNE3	2.46632e-06	0.715961	0.137	0.281	0.0721671	S100A2_Mac
EIF3D	2.50066e-06	0.687112	0.199	0.379	0.0731717	S100A2_Mac
NDUFB11	2.51997e-06	0.620523	0.299	0.53	0.0737367	S100A2_Mac
MAF1	2.88448e-06	0.647235	0.14	0.286	0.0844028	S100A2_Mac
VEGFB	2.89465e-06	0.667171	0.159	0.309	0.0847003	S100A2_Mac
DGUOK	3.2272e-06	0.727331	0.184	0.344	0.094431	S100A2_Mac
MRPL13	3.25313e-06	0.924701	0.143	0.283	0.0951899	S100A2_Mac
RBIS	3.28254e-06	0.799325	0.215	0.388	0.0960505	S100A2_Mac
PSMB9	3.35056e-06	0.673356	0.349	0.616	0.0980408	S100A2_Mac
TCEAL8	3.54661e-06	0.886346	0.131	0.269	0.103777	S100A2_Mac
RNASEH2C	3.56099e-06	0.645911	0.178	0.34	0.104198	S100A2_Mac
THOC7	3.57391e-06	1.06495	0.168	0.336	0.104576	S100A2_Mac
ATP5F1C	3.61201e-06	0.711663	0.318	0.558	0.105691	S100A2_Mac
PSMG2	3.68861e-06	0.712278	0.19	0.361	0.107932	S100A2_Mac
SNAP29	3.77861e-06	0.738154	0.162	0.309	0.110566	S100A2_Mac
PAIP2	3.89259e-06	0.641897	0.305	0.526	0.113901	S100A2_Mac
HADHA	4.20047e-06	0.812963	0.246	0.446	0.12291	S100A2_Mac
SYPL1	4.38261e-06	0.63075	0.156	0.302	0.12824	S100A2_Mac
ZCRB1	4.61732e-06	0.646293	0.202	0.373	0.135107	S100A2_Mac
LARP4B	4.71556e-06	0.629185	0.137	0.274	0.137982	S100A2_Mac
DCTN3	4.84373e-06	0.804993	0.174	0.33	0.141732	S100A2_Mac
TIMM8B	5.00117e-06	1.08755	0.234	0.426	0.146339	S100A2_Mac
BUD23	5.03843e-06	0.715321	0.134	0.266	0.14743	S100A2_Mac
MRPL55	5.08284e-06	0.768548	0.131	0.262	0.148729	S100A2_Mac
CMTM3	5.17795e-06	0.945261	0.165	0.33	0.151512	S100A2_Mac
TAX1BP3	5.27264e-06	0.817351	0.128	0.264	0.154283	S100A2_Mac
CIAO2B	5.32508e-06	0.875974	0.274	0.499	0.155817	S100A2_Mac
CD302	5.36398e-06	0.673297	0.143	0.286	0.156955	S100A2_Mac
RPS25	5.4549e-06	0.792554	0.667	0.862	0.159616	S100A2_Mac
RPLP2	5.53527e-06	0.661327	0.732	0.91	0.161967	S100A2_Mac
COMMD6	5.74277e-06	0.761102	0.33	0.602	0.168039	S100A2_Mac
POLR2K	5.8629e-06	0.777105	0.187	0.351	0.171554	S100A2_Mac
GET3	5.86871e-06	0.828244	0.165	0.321	0.171724	S100A2_Mac
SDHB	5.90081e-06	0.673962	0.259	0.455	0.172664	S100A2_Mac
CHMP1A	6.29803e-06	0.898098	0.125	0.253	0.184287	S100A2_Mac
METTL26	6.34855e-06	0.729651	0.125	0.256	0.185765	S100A2_Mac
PAIP1	6.69115e-06	0.672588	0.134	0.265	0.19579	S100A2_Mac
APRT	6.70986e-06	0.675999	0.274	0.493	0.196337	S100A2_Mac
SAR1B	6.9663e-06	0.722091	0.168	0.32	0.203841	S100A2_Mac
EVA1B	7.03069e-06	1.00597	0.174	0.33	0.205725	S100A2_Mac
RPS11	7.26682e-06	0.649916	0.735	0.922	0.212635	S100A2_Mac
CCT7	7.34668e-06	0.617666	0.165	0.308	0.214971	S100A2_Mac
LRRC59	7.55957e-06	0.819381	0.178	0.329	0.221201	S100A2_Mac
NAA20	7.70862e-06	0.710971	0.178	0.335	0.225562	S100A2_Mac
NDUFB8	7.7254e-06	0.824263	0.305	0.544	0.226053	S100A2_Mac
USP22	7.7302e-06	0.660893	0.134	0.258	0.226193	S100A2_Mac
ZBTB8OS	8.19206e-06	0.846283	0.125	0.256	0.239708	S100A2_Mac
ARL5A	8.19601e-06	0.738833	0.171	0.316	0.239823	S100A2_Mac
CALCOCO2	8.25351e-06	0.71549	0.174	0.328	0.241506	S100A2_Mac
DDX46	8.30843e-06	0.666068	0.181	0.335	0.243113	S100A2_Mac
MPLKIP	8.59257e-06	0.871539	0.137	0.272	0.251427	S100A2_Mac
HSPB11	8.78127e-06	0.715005	0.159	0.304	0.256949	S100A2_Mac
ARHGAP45	9.35098e-06	0.698971	0.156	0.294	0.273619	S100A2_Mac
RABL6	9.47944e-06	0.666718	0.15	0.283	0.277378	S100A2_Mac
PIN1	9.52291e-06	0.726958	0.146	0.277	0.27865	S100A2_Mac
RPL29	9.78098e-06	0.822291	0.645	0.865	0.286201	S100A2_Mac
MRPL14	1.04629e-05	0.918937	0.156	0.302	0.306154	S100A2_Mac
NDUFB4	1.05704e-05	0.805093	0.321	0.552	0.3093	S100A2_Mac
ANAPC11	1.08931e-05	0.836301	0.252	0.444	0.318742	S100A2_Mac
WDR82	1.11047e-05	0.635824	0.178	0.333	0.324934	S100A2_Mac
STUB1	1.11077e-05	0.732423	0.196	0.359	0.325022	S100A2_Mac
SNHG6	1.11698e-05	0.857131	0.24	0.42	0.32684	S100A2_Mac
SH3BP1	1.13873e-05	0.905173	0.134	0.267	0.333204	S100A2_Mac
ARF6	1.18013e-05	0.616414	0.287	0.509	0.345318	S100A2_Mac
ATP5IF1	1.18675e-05	0.719799	0.318	0.568	0.347256	S100A2_Mac
RLIM	1.19017e-05	0.643769	0.137	0.262	0.348255	S100A2_Mac
SLC25A11	1.19712e-05	1.01755	0.143	0.283	0.35029	S100A2_Mac
TREM2	1.20086e-05	0.795011	0.156	0.299	0.351383	S100A2_Mac
PDAP1	1.22035e-05	0.808003	0.181	0.334	0.357086	S100A2_Mac
CENPX	1.23344e-05	1.10915	0.128	0.256	0.360916	S100A2_Mac
CHCHD7	1.24197e-05	0.951246	0.159	0.305	0.363414	S100A2_Mac
SEC11A	1.25791e-05	0.69038	0.312	0.558	0.368078	S100A2_Mac
RPL7L1	1.25817e-05	0.709123	0.14	0.276	0.368153	S100A2_Mac
C12orf57	1.26058e-05	0.625249	0.165	0.317	0.368857	S100A2_Mac
NOP53	1.2706e-05	0.603517	0.209	0.365	0.371791	S100A2_Mac
FNTA	1.28597e-05	0.650691	0.153	0.289	0.376287	S100A2_Mac
COPS2	1.29124e-05	0.724767	0.143	0.279	0.377829	S100A2_Mac
PHPT1	1.36549e-05	0.788983	0.227	0.401	0.399555	S100A2_Mac
RPL27A	1.42938e-05	0.776251	0.723	0.912	0.418251	S100A2_Mac
SNRPD3	1.47683e-05	0.601035	0.196	0.357	0.432135	S100A2_Mac
CIR1	1.4924e-05	0.619806	0.168	0.306	0.436693	S100A2_Mac
KRT14	1.523e-05	1.62851	0.598	0.671	0.445646	S100A2_Mac
AP2A2	1.53069e-05	0.791791	0.178	0.326	0.447895	S100A2_Mac
SHISA5	1.58249e-05	0.654017	0.196	0.351	0.463053	S100A2_Mac
SNU13	1.61861e-05	0.898524	0.259	0.474	0.473621	S100A2_Mac
COPS5	1.6443e-05	0.830405	0.15	0.279	0.481138	S100A2_Mac
FDX1	1.67804e-05	0.817699	0.153	0.287	0.49101	S100A2_Mac
DCTN6	1.72917e-05	0.635344	0.137	0.262	0.505973	S100A2_Mac
NDUFA6	1.73613e-05	0.856624	0.215	0.382	0.508009	S100A2_Mac
COMT	1.741e-05	0.864345	0.318	0.544	0.509434	S100A2_Mac
PSMB8	1.78452e-05	0.60817	0.308	0.539	0.522167	S100A2_Mac
NDUFV3	1.8284e-05	0.86962	0.14	0.272	0.535007	S100A2_Mac
LAMTOR1	1.93064e-05	0.749036	0.346	0.591	0.564925	S100A2_Mac
EIF3I	1.93714e-05	1.08261	0.193	0.347	0.566825	S100A2_Mac
CMTM7	2.0121e-05	0.669324	0.162	0.293	0.588761	S100A2_Mac
NDUFV2	2.04204e-05	0.629276	0.383	0.666	0.597522	S100A2_Mac
BUB3	2.06885e-05	0.931906	0.137	0.269	0.605367	S100A2_Mac
DENR	2.15952e-05	0.625785	0.143	0.278	0.631896	S100A2_Mac
TWF1	2.20298e-05	0.727277	0.131	0.253	0.644614	S100A2_Mac
DDX42	2.24493e-05	0.658052	0.137	0.268	0.656889	S100A2_Mac
FBP1	2.30769e-05	0.626455	0.125	0.25	0.675254	S100A2_Mac
ORAI1	2.44428e-05	0.768013	0.156	0.293	0.715219	S100A2_Mac
SUPT16H	2.47306e-05	0.922382	0.159	0.301	0.723641	S100A2_Mac
FCHO2	2.6954e-05	0.776832	0.184	0.342	0.788701	S100A2_Mac
YIF1A	2.89464e-05	0.832157	0.131	0.25	0.847001	S100A2_Mac
HPRT1	2.94797e-05	0.720308	0.134	0.257	0.862606	S100A2_Mac
MDH2	3.16833e-05	0.607198	0.218	0.374	0.927086	S100A2_Mac
NAA10	3.21759e-05	0.90894	0.153	0.284	0.941499	S100A2_Mac
POLR2F	3.47572e-05	0.766251	0.137	0.255	1	S100A2_Mac
TIMM13	3.49522e-05	0.805509	0.193	0.346	1	S100A2_Mac
NOL7	3.63337e-05	0.670027	0.202	0.353	1	S100A2_Mac
MED10	3.75072e-05	0.600943	0.14	0.267	1	S100A2_Mac
LLPH	3.88607e-05	0.761976	0.159	0.291	1	S100A2_Mac
UQCRH	3.97774e-05	0.605289	0.389	0.679	1	S100A2_Mac
MRPS16	3.99511e-05	1.08502	0.159	0.291	1	S100A2_Mac
SNRPD2	4.06576e-05	0.817147	0.231	0.407	1	S100A2_Mac
PSMF1	4.13043e-05	0.943876	0.131	0.253	1	S100A2_Mac
CMC1	4.19045e-05	0.709476	0.146	0.272	1	S100A2_Mac
SF3B5	4.21554e-05	0.802146	0.274	0.458	1	S100A2_Mac
RNF115	4.41455e-05	0.709637	0.137	0.259	1	S100A2_Mac
NDUFS4	4.42014e-05	0.660247	0.134	0.253	1	S100A2_Mac
ETFB	4.67791e-05	0.884077	0.215	0.378	1	S100A2_Mac
NSA2	5.23677e-05	0.836234	0.246	0.426	1	S100A2_Mac
C1QBP	5.24076e-05	1.02227	0.206	0.369	1	S100A2_Mac
LSM5	5.52872e-05	0.839708	0.209	0.371	1	S100A2_Mac
UBE2V2	5.76475e-05	0.752169	0.153	0.278	1	S100A2_Mac
NOP56	5.92822e-05	1.02768	0.196	0.351	1	S100A2_Mac
EIF5A	6.07808e-05	0.729865	0.296	0.503	1	S100A2_Mac
CGGBP1	6.11142e-05	0.645835	0.171	0.305	1	S100A2_Mac
JPT1	6.25666e-05	0.637	0.389	0.678	1	S100A2_Mac
GOLT1B	6.31954e-05	0.672889	0.134	0.251	1	S100A2_Mac
EIF2S2	6.64868e-05	0.944178	0.315	0.544	1	S100A2_Mac
SH3GLB1	7.00612e-05	0.715619	0.34	0.561	1	S100A2_Mac
RPL35A	7.18177e-05	0.734841	0.682	0.889	1	S100A2_Mac
RPS21	7.34174e-05	0.903889	0.651	0.868	1	S100A2_Mac
GLRX5	7.52541e-05	0.970783	0.143	0.266	1	S100A2_Mac
GTF3A	7.95123e-05	0.719877	0.215	0.366	1	S100A2_Mac
BIN2	8.04772e-05	0.932706	0.146	0.265	1	S100A2_Mac
ISCU	8.12824e-05	0.695162	0.28	0.466	1	S100A2_Mac
NDUFV1	9.27875e-05	1.00134	0.162	0.291	1	S100A2_Mac
SBDS	9.29543e-05	1.11255	0.181	0.321	1	S100A2_Mac
MRPL57	0.00010013	0.779652	0.206	0.352	1	S100A2_Mac
SSB	0.000100862	0.713514	0.349	0.59	1	S100A2_Mac
MRPL51	0.000103122	0.811914	0.234	0.4	1	S100A2_Mac
MRPL27	0.000107573	1.1495	0.162	0.292	1	S100A2_Mac
NDUFA10	0.000109842	0.634476	0.174	0.304	1	S100A2_Mac
TBL1XR1	0.000118461	0.811875	0.209	0.36	1	S100A2_Mac
TMEM230	0.00011882	0.791537	0.234	0.395	1	S100A2_Mac
SSNA1	0.000120667	0.817522	0.165	0.285	1	S100A2_Mac
CCNDBP1	0.000121694	0.798172	0.14	0.258	1	S100A2_Mac
EIF5B	0.000123682	0.932015	0.227	0.397	1	S100A2_Mac
NDUFA3	0.00012536	0.961006	0.24	0.407	1	S100A2_Mac
SH3BGRL	0.000127672	0.632173	0.421	0.717	1	S100A2_Mac
SNRPC	0.000138495	0.911531	0.202	0.355	1	S100A2_Mac
SNRPE	0.000139073	0.883743	0.243	0.41	1	S100A2_Mac
ACP1	0.000140018	1.03906	0.162	0.291	1	S100A2_Mac
APBB1IP	0.000145751	0.733882	0.168	0.291	1	S100A2_Mac
PYURF	0.000146521	0.669677	0.153	0.275	1	S100A2_Mac
PGAM1	0.000148775	0.704848	0.287	0.487	1	S100A2_Mac
EDF1	0.000162444	0.607021	0.386	0.651	1	S100A2_Mac
NSL1	0.000163512	0.685571	0.15	0.268	1	S100A2_Mac
ANP32B	0.000166712	0.872648	0.283	0.485	1	S100A2_Mac
UQCRC2	0.000167503	0.70479	0.234	0.389	1	S100A2_Mac
MRPS15	0.000168124	0.67064	0.15	0.268	1	S100A2_Mac
NDUFA7	0.000173118	0.904055	0.159	0.28	1	S100A2_Mac
RPS15A	0.000177179	0.697174	0.698	0.907	1	S100A2_Mac
PPM1G	0.000178973	0.746831	0.202	0.351	1	S100A2_Mac
LUC7L2	0.000184426	0.734386	0.174	0.293	1	S100A2_Mac
STX16	0.000184594	0.703034	0.181	0.309	1	S100A2_Mac
GSTP1	0.000189302	0.810767	0.455	0.735	1	S100A2_Mac
SMDT1	0.000192494	0.908911	0.181	0.315	1	S100A2_Mac
PFDN1	0.000201489	0.808341	0.156	0.273	1	S100A2_Mac
MRPL34	0.000203634	1.0701	0.15	0.268	1	S100A2_Mac
ELAVL1	0.000205339	0.706505	0.181	0.307	1	S100A2_Mac
CISD3	0.000221691	0.828241	0.15	0.269	1	S100A2_Mac
C9orf78	0.000224343	1.06901	0.199	0.332	1	S100A2_Mac
TRAPPC2L	0.000254748	0.93905	0.156	0.269	1	S100A2_Mac
UBE2G2	0.000258493	0.786694	0.153	0.263	1	S100A2_Mac
CIAO2A	0.000276417	0.824126	0.174	0.301	1	S100A2_Mac
SERBP1	0.000282163	0.626232	0.374	0.641	1	S100A2_Mac
EIF3F	0.000286169	0.783338	0.246	0.413	1	S100A2_Mac
TMPO	0.000286525	0.786391	0.146	0.259	1	S100A2_Mac
FAM32A	0.000286837	0.904399	0.143	0.251	1	S100A2_Mac
HNRNPL	0.000290933	0.691633	0.184	0.304	1	S100A2_Mac
COX6A1	0.000294362	0.697485	0.374	0.633	1	S100A2_Mac
RPS4X	0.000313274	0.710344	0.679	0.889	1	S100A2_Mac
PCGF5	0.00031522	0.638437	0.146	0.255	1	S100A2_Mac
RPL26L1	0.000335313	0.817162	0.153	0.266	1	S100A2_Mac
DDX27	0.000341903	0.902306	0.165	0.276	1	S100A2_Mac
POLR2G	0.00037055	0.890298	0.146	0.257	1	S100A2_Mac
STOML2	0.000400753	0.710741	0.156	0.268	1	S100A2_Mac
GPR34	0.000407696	0.811186	0.178	0.296	1	S100A2_Mac
SMARCC1	0.000458759	0.61165	0.153	0.264	1	S100A2_Mac
RANBP1	0.000480426	0.894395	0.224	0.381	1	S100A2_Mac
VDAC3	0.000481714	0.703002	0.184	0.304	1	S100A2_Mac
ECH1	0.000496611	1.30759	0.143	0.25	1	S100A2_Mac
PCBD1	0.000508284	0.966092	0.174	0.297	1	S100A2_Mac
MAPKAPK3	0.000522418	1.15158	0.143	0.252	1	S100A2_Mac
ABHD17A	0.000526256	1.2129	0.199	0.337	1	S100A2_Mac
CCDC85B	0.000534045	1.09577	0.259	0.425	1	S100A2_Mac
PA2G4	0.000556443	0.831398	0.259	0.426	1	S100A2_Mac
PDCD5	0.000574807	0.927477	0.199	0.33	1	S100A2_Mac
ATP5MPL	0.000589498	0.641296	0.389	0.644	1	S100A2_Mac
ADH5	0.000626137	1.1901	0.174	0.295	1	S100A2_Mac
APOE	0.000665388	0.717177	0.533	0.469	1	S100A2_Mac
RPL6	0.00067596	0.847513	0.639	0.852	1	S100A2_Mac
FAM162A	0.0006845	0.950948	0.168	0.283	1	S100A2_Mac
LSM4	0.000703445	1.11524	0.206	0.339	1	S100A2_Mac
CEBPZ	0.000726173	0.721535	0.168	0.278	1	S100A2_Mac
PTMS	0.000744493	0.678231	0.402	0.658	1	S100A2_Mac
MRPL47	0.000748918	0.858184	0.193	0.314	1	S100A2_Mac
UQCRFS1	0.000782979	1.17485	0.224	0.375	1	S100A2_Mac
TMEM258	0.000805586	0.732775	0.358	0.604	1	S100A2_Mac
SNHG8	0.000846452	1.09057	0.181	0.302	1	S100A2_Mac
NDUFB9	0.0008661	0.811834	0.212	0.337	1	S100A2_Mac
RTCA	0.00086887	0.61148	0.165	0.272	1	S100A2_Mac
NIFK	0.000930101	0.849591	0.153	0.256	1	S100A2_Mac
ALKBH7	0.000949727	0.861277	0.168	0.282	1	S100A2_Mac
TOMM6	0.000965274	0.856577	0.296	0.486	1	S100A2_Mac
FIS1	0.00109735	1.14936	0.246	0.392	1	S100A2_Mac
RPA3	0.00133506	1.11488	0.171	0.282	1	S100A2_Mac
CIAO1	0.00164882	0.739335	0.181	0.285	1	S100A2_Mac
TMA7	0.00170771	0.657143	0.405	0.693	1	S100A2_Mac
POLR2I	0.0017923	0.873517	0.153	0.252	1	S100A2_Mac
COX20	0.00193017	0.806466	0.174	0.288	1	S100A2_Mac
S100A2	0.00195402	1.83584	0.514	0.594	1	S100A2_Mac
SLIRP	0.00198739	1.03556	0.28	0.456	1	S100A2_Mac
TOMM5	0.00212623	0.909437	0.215	0.345	1	S100A2_Mac
SUCLG1	0.00217938	1.06752	0.174	0.28	1	S100A2_Mac
RPS3	0.00231575	0.745775	0.639	0.869	1	S100A2_Mac
RPS7	0.00234411	0.622184	0.667	0.879	1	S100A2_Mac
PPDPF	0.00246967	0.942175	0.333	0.54	1	S100A2_Mac
RPS4Y1	0.00269728	0.740537	0.212	0.339	1	S100A2_Mac
GUK1	0.00277334	0.712811	0.455	0.722	1	S100A2_Mac
RPL23A	0.00277376	0.743724	0.66	0.877	1	S100A2_Mac
EVL	0.00281426	0.649348	0.187	0.297	1	S100A2_Mac
S100B	0.0030112	0.602091	0.19	0.297	1	S100A2_Mac
ATP5ME	0.00304769	0.866901	0.38	0.608	1	S100A2_Mac
PSMB1	0.00330482	0.788995	0.421	0.684	1	S100A2_Mac
FKBP1A	0.00340443	0.739922	0.421	0.708	1	S100A2_Mac
MRPS34	0.00391641	1.11608	0.171	0.281	1	S100A2_Mac
COX6B1	0.00407534	0.736376	0.436	0.711	1	S100A2_Mac
RPSA	0.00412969	0.891224	0.573	0.762	1	S100A2_Mac
IER5L	0.00420357	0.744132	0.159	0.25	1	S100A2_Mac
RPL5	0.00437926	0.98312	0.57	0.746	1	S100A2_Mac
RPL14	0.00486288	0.765085	0.607	0.802	1	S100A2_Mac
RPL27	0.00519876	0.795739	0.601	0.831	1	S100A2_Mac
SNHG32	0.00570357	0.766888	0.171	0.264	1	S100A2_Mac
DUT	0.00575901	1.01167	0.162	0.258	1	S100A2_Mac
CMC2	0.00667194	0.751652	0.184	0.283	1	S100A2_Mac
RPLP0	0.00824665	0.982851	0.57	0.767	1	S100A2_Mac
POLR2L	0.00824738	0.904935	0.364	0.578	1	S100A2_Mac
SRSF7	0.00976585	0.756046	0.364	0.587	1	S100A2_Mac
UQCR11	0.00988781	0.772514	0.442	0.687	1	S100A2_Mac
JAML	1.00628e-83	2.1888	0.585	0.183	2.94447e-79	IDO1_Mac
CLEC10A	2.40044e-63	2.27919	0.505	0.174	7.02392e-59	IDO1_Mac
PPA1	1.73925e-49	1.78154	0.662	0.399	5.08922e-45	IDO1_Mac
REL	2.38506e-47	1.07038	0.845	0.667	6.97892e-43	IDO1_Mac
RPS24	1.90757e-44	0.613849	0.975	0.914	5.58173e-40	IDO1_Mac
RUNX3	1.83036e-41	1.27908	0.689	0.461	5.3558e-37	IDO1_Mac
GPR183	5.21984e-40	0.897811	0.906	0.766	1.52738e-35	IDO1_Mac
AREG	1.04268e-38	1.90001	0.563	0.298	3.05099e-34	IDO1_Mac
ETV3	2.8396e-37	1.34971	0.635	0.388	8.30897e-33	IDO1_Mac
PRELID1	2.33052e-36	0.881256	0.782	0.581	6.81932e-32	IDO1_Mac
FLT1	6.22824e-36	1.68664	0.306	0.09	1.82245e-31	IDO1_Mac
PLAC8	9.01014e-36	2.44957	0.264	0.068	2.63646e-31	IDO1_Mac
GRASP	2.94961e-35	1.2358	0.612	0.369	8.63085e-31	IDO1_Mac
MALT1	3.65681e-35	1.0118	0.745	0.528	1.07002e-30	IDO1_Mac
S100A4	5.5797e-35	0.818754	0.908	0.818	1.63268e-30	IDO1_Mac
ADAM19	8.80636e-35	1.79164	0.385	0.149	2.57683e-30	IDO1_Mac
IL1B	1.76586e-34	0.670317	0.96	0.868	5.16709e-30	IDO1_Mac
RPS13	3.07031e-34	0.61913	0.942	0.849	8.98404e-30	IDO1_Mac
SERPINB9	4.27914e-34	0.935588	0.833	0.675	1.25212e-29	IDO1_Mac
NR4A3	7.37941e-34	0.929483	0.824	0.649	2.15929e-29	IDO1_Mac
PIM3	1.75176e-33	0.832652	0.827	0.655	5.12583e-29	IDO1_Mac
BCL2A1	2.45427e-33	0.72995	0.921	0.831	7.18145e-29	IDO1_Mac
NRARP	2.50269e-33	1.794	0.424	0.188	7.32313e-29	IDO1_Mac
RPS8	8.72521e-33	0.640409	0.908	0.827	2.55308e-28	IDO1_Mac
GPR157	1.7229e-32	2.16852	0.324	0.118	5.04137e-28	IDO1_Mac
C15orf48	1.76258e-32	0.734763	0.932	0.852	5.15748e-28	IDO1_Mac
G0S2	2.25797e-32	0.951129	0.808	0.593	6.60705e-28	IDO1_Mac
EHD1	3.1141e-32	0.972381	0.674	0.434	9.11216e-28	IDO1_Mac
RASSF5	4.63991e-32	0.94004	0.746	0.547	1.35768e-27	IDO1_Mac
BIRC3	7.82125e-32	1.20081	0.745	0.549	2.28858e-27	IDO1_Mac
TNFAIP8	9.35187e-32	0.848496	0.838	0.713	2.73645e-27	IDO1_Mac
LST1	1.86795e-31	0.77389	0.809	0.664	5.46581e-27	IDO1_Mac
LTB	2.15607e-31	2.02465	0.336	0.129	6.30887e-27	IDO1_Mac
LAMP3	1.36261e-30	2.33945	0.293	0.1	3.98712e-26	IDO1_Mac
PKIB	1.7056e-27	2.19546	0.259	0.085	4.99076e-23	IDO1_Mac
PHLDA2	3.14219e-27	1.13833	0.669	0.476	9.19436e-23	IDO1_Mac
ATP1B3	1.14913e-26	0.657216	0.887	0.784	3.36248e-22	IDO1_Mac
VEGFA	1.38817e-26	0.708256	0.795	0.612	4.06191e-22	IDO1_Mac
NFKB1	8.89841e-26	0.638972	0.879	0.753	2.60376e-21	IDO1_Mac
CKLF	1.01835e-25	0.997597	0.656	0.5	2.97979e-21	IDO1_Mac
TIMP1	1.82631e-25	0.837752	0.836	0.699	5.34398e-21	IDO1_Mac
CFP	4.70929e-25	1.47459	0.309	0.123	1.37799e-20	IDO1_Mac
PPIF	6.9006e-25	0.864081	0.806	0.652	2.01918e-20	IDO1_Mac
TET2	9.02534e-25	0.702017	0.786	0.611	2.6409e-20	IDO1_Mac
ARL5B	3.60938e-24	0.843416	0.748	0.558	1.05614e-19	IDO1_Mac
IL1RN	8.21472e-24	0.734942	0.858	0.698	2.40371e-19	IDO1_Mac
CORO1A	1.63158e-23	0.894498	0.638	0.471	4.77417e-19	IDO1_Mac
ATP2B1	2.43544e-23	0.75452	0.777	0.627	7.12634e-19	IDO1_Mac
DENND4A	9.62468e-23	0.969161	0.581	0.39	2.81628e-18	IDO1_Mac
KDM6B	2.28355e-22	0.681513	0.826	0.686	6.68188e-18	IDO1_Mac
STK4	1.08648e-21	0.832046	0.656	0.522	3.17914e-17	IDO1_Mac
PAK1	1.57141e-21	1.20271	0.482	0.311	4.59811e-17	IDO1_Mac
SERPINB1	1.58151e-21	0.823846	0.773	0.655	4.62765e-17	IDO1_Mac
HLA-DQB1	2.80722e-21	0.663589	0.926	0.882	8.21421e-17	IDO1_Mac
BAZ1A	3.01853e-21	0.711622	0.755	0.61	8.83253e-17	IDO1_Mac
IDO1	3.47834e-21	1.82908	0.446	0.264	1.0178e-16	IDO1_Mac
GPBP1	6.39215e-21	0.658102	0.759	0.629	1.87041e-16	IDO1_Mac
BCL3	8.5957e-21	0.999556	0.518	0.332	2.51519e-16	IDO1_Mac
CIB1	1.34143e-20	0.6506	0.692	0.541	3.92517e-16	IDO1_Mac
MARCKSL1	2.03639e-20	0.979971	0.579	0.401	5.95868e-16	IDO1_Mac
FPR1	3.82907e-20	1.04017	0.493	0.306	1.12042e-15	IDO1_Mac
CYTIP	9.80302e-20	0.906613	0.516	0.331	2.86846e-15	IDO1_Mac
CDKN1A	1.14396e-19	0.604522	0.815	0.678	3.34736e-15	IDO1_Mac
ALDH2	1.23627e-19	0.879348	0.603	0.43	3.61745e-15	IDO1_Mac
MCOLN2	1.64885e-19	1.20467	0.388	0.212	4.8247e-15	IDO1_Mac
SKIL	1.79227e-19	0.715698	0.754	0.615	5.24437e-15	IDO1_Mac
MAP4K4	2.38922e-19	1.10655	0.54	0.371	6.99111e-15	IDO1_Mac
TES	4.90411e-19	1.25139	0.421	0.254	1.43499e-14	IDO1_Mac
SELENOK	8.70133e-19	0.766281	0.786	0.662	2.5461e-14	IDO1_Mac
CSF2RA	8.97339e-19	1.01033	0.554	0.391	2.6257e-14	IDO1_Mac
NFKBID	1.01615e-18	0.925557	0.577	0.417	2.97334e-14	IDO1_Mac
IRF4	1.10552e-18	1.27141	0.358	0.184	3.23485e-14	IDO1_Mac
CPVL	1.15067e-18	0.76479	0.701	0.566	3.36697e-14	IDO1_Mac
LGALS2	1.45811e-18	1.24505	0.417	0.244	4.26659e-14	IDO1_Mac
MIR155HG	1.69683e-18	0.88782	0.588	0.422	4.96509e-14	IDO1_Mac
FCGR2B	1.96698e-18	0.680897	0.597	0.409	5.75559e-14	IDO1_Mac
CST7	3.10735e-17	1.37656	0.435	0.273	9.09242e-13	IDO1_Mac
PEA15	9.61214e-17	0.652548	0.691	0.567	2.81261e-12	IDO1_Mac
IFITM2	1.12458e-16	0.798995	0.709	0.591	3.29064e-12	IDO1_Mac
DAPP1	1.32932e-16	1.31678	0.399	0.244	3.88974e-12	IDO1_Mac
EREG	1.41986e-16	0.780172	0.655	0.49	4.15465e-12	IDO1_Mac
BID	1.4931e-16	0.72284	0.629	0.496	4.36897e-12	IDO1_Mac
AGO2	2.33505e-16	0.969839	0.45	0.285	6.83259e-12	IDO1_Mac
GLS	2.81645e-16	0.664657	0.716	0.595	8.24123e-12	IDO1_Mac
SLC7A5	4.89597e-16	0.752998	0.619	0.482	1.43261e-11	IDO1_Mac
RHOF	8.37204e-16	1.33747	0.272	0.132	2.44974e-11	IDO1_Mac
RBM3	1.61043e-15	0.604722	0.685	0.533	4.71229e-11	IDO1_Mac
CEACAM4	8.4402e-15	1.36655	0.264	0.13	2.46969e-10	IDO1_Mac
NFAT5	8.46651e-15	0.728588	0.538	0.395	2.47738e-10	IDO1_Mac
DDX21	1.50125e-14	0.697485	0.595	0.462	4.39282e-10	IDO1_Mac
GLIPR1	1.72197e-14	0.670888	0.597	0.465	5.03866e-10	IDO1_Mac
TRAF1	1.72266e-14	0.783456	0.536	0.381	5.04069e-10	IDO1_Mac
MOB3A	1.73082e-14	0.792371	0.495	0.354	5.06454e-10	IDO1_Mac
STK17B	5.35516e-14	0.618181	0.692	0.582	1.56697e-09	IDO1_Mac
INSIG1	5.77122e-14	0.814198	0.601	0.479	1.68872e-09	IDO1_Mac
TWISTNB	1.45445e-13	1.19902	0.424	0.281	4.25586e-09	IDO1_Mac
SYAP1	6.47186e-13	0.770434	0.567	0.436	1.89373e-08	IDO1_Mac
SNHG15	6.78792e-13	0.856695	0.374	0.233	1.98621e-08	IDO1_Mac
PGLS	1.68834e-12	0.779903	0.45	0.317	4.94026e-08	IDO1_Mac
CNN2	2.03893e-12	0.784222	0.473	0.351	5.9661e-08	IDO1_Mac
PDE7A	2.0525e-12	0.938942	0.345	0.211	6.00583e-08	IDO1_Mac
C17orf49	2.33629e-12	0.802693	0.504	0.384	6.83623e-08	IDO1_Mac
ATG3	3.88833e-12	0.647292	0.624	0.53	1.13776e-07	IDO1_Mac
IL23A	3.92515e-12	1.32865	0.324	0.193	1.14854e-07	IDO1_Mac
CIITA	8.34881e-12	0.695753	0.527	0.405	2.44295e-07	IDO1_Mac
OLR1	8.95226e-12	0.826892	0.536	0.4	2.61952e-07	IDO1_Mac
ISG20	9.99515e-12	0.776408	0.613	0.474	2.92468e-07	IDO1_Mac
CD55	1.05256e-11	0.77173	0.486	0.35	3.0799e-07	IDO1_Mac
GGT5	1.58893e-11	0.670932	0.333	0.192	4.64937e-07	IDO1_Mac
FPR2	2.89765e-11	1.38205	0.279	0.162	8.47881e-07	IDO1_Mac
TBC1D17	3.47638e-11	1.27604	0.254	0.141	1.01722e-06	IDO1_Mac
NIBAN1	3.56007e-11	0.682403	0.468	0.34	1.04171e-06	IDO1_Mac
HOMER1	7.94106e-11	1.07312	0.351	0.227	2.32363e-06	IDO1_Mac
NAF1	1.25232e-10	1.19566	0.275	0.162	3.6644e-06	IDO1_Mac
ATF5	1.29745e-10	0.637029	0.603	0.488	3.79646e-06	IDO1_Mac
USP12	1.37885e-10	0.81964	0.462	0.343	4.03465e-06	IDO1_Mac
CLEC4A	1.6876e-10	0.713293	0.491	0.362	4.93809e-06	IDO1_Mac
APOBEC3A	6.30006e-10	1.29205	0.279	0.164	1.84346e-05	IDO1_Mac
PDE4A	1.39664e-09	0.643301	0.545	0.445	4.08671e-05	IDO1_Mac
AC090617.10	1.70117e-09	0.977291	0.324	0.208	4.9778e-05	IDO1_Mac
DPYSL2	1.70419e-09	0.616154	0.599	0.492	4.98663e-05	IDO1_Mac
ALOX5	2.21394e-09	0.680497	0.405	0.289	6.47821e-05	IDO1_Mac
NCR3LG1	5.44464e-09	0.771352	0.3	0.192	0.000159316	IDO1_Mac
GPR132	7.65176e-09	0.602375	0.487	0.373	0.000223898	IDO1_Mac
CKS2	8.70488e-09	0.643389	0.471	0.364	0.000254713	IDO1_Mac
LILRA5	1.04835e-08	0.808892	0.356	0.249	0.000306757	IDO1_Mac
CD52	1.2436e-08	0.705491	0.268	0.165	0.000363889	IDO1_Mac
CRELD2	1.42755e-08	0.918604	0.288	0.186	0.000417716	IDO1_Mac
IL1R1	1.53204e-08	0.787536	0.329	0.217	0.00044829	IDO1_Mac
CDC42EP2	3.14564e-08	0.857101	0.313	0.208	0.000920446	IDO1_Mac
LIMD2	5.36221e-08	0.877651	0.286	0.187	0.00156904	IDO1_Mac
NRG1	5.93717e-08	1.11197	0.29	0.196	0.00173727	IDO1_Mac
DLEU2	6.5274e-08	0.85886	0.354	0.253	0.00190998	IDO1_Mac
ELMO1	6.61611e-08	0.838202	0.34	0.24	0.00193594	IDO1_Mac
LDLRAD4	6.92221e-08	0.733541	0.318	0.213	0.00202551	IDO1_Mac
SEMA6B	7.61123e-08	0.733014	0.423	0.313	0.00222712	IDO1_Mac
LINC00513	9.28904e-08	0.820674	0.327	0.226	0.00271807	IDO1_Mac
JMJD6	1.19146e-07	0.614414	0.43	0.325	0.00348634	IDO1_Mac
SERINC5	1.30463e-07	0.658772	0.378	0.282	0.00381748	IDO1_Mac
WARS	2.70098e-07	0.664611	0.603	0.506	0.00790335	IDO1_Mac
HIVEP2	4.28681e-07	0.664317	0.34	0.239	0.0125436	IDO1_Mac
B3GNT5	4.60907e-07	0.616782	0.534	0.448	0.0134866	IDO1_Mac
SERPINB9P1	4.6097e-07	0.697093	0.315	0.218	0.0134884	IDO1_Mac
GPR35	5.2389e-07	0.749289	0.263	0.171	0.0153296	IDO1_Mac
CXCR4	5.46437e-07	0.66847	0.552	0.478	0.0159893	IDO1_Mac
ITPR1	5.55615e-07	0.611087	0.493	0.399	0.0162579	IDO1_Mac
SMAD7	9.73524e-07	0.720701	0.379	0.287	0.0284863	IDO1_Mac
HGSNAT	1.15876e-06	0.711463	0.32	0.23	0.0339064	IDO1_Mac
RBBP8	1.20114e-06	0.739229	0.371	0.279	0.0351467	IDO1_Mac
AC005224.2	1.31084e-06	0.794962	0.324	0.232	0.0383564	IDO1_Mac
HEIH	1.3351e-06	0.634082	0.376	0.29	0.0390664	IDO1_Mac
TNFRSF10B	1.50992e-06	0.902708	0.297	0.21	0.0441819	IDO1_Mac
GPR65	1.73274e-06	0.89057	0.424	0.347	0.0507018	IDO1_Mac
S100A8	1.78006e-06	0.626262	0.694	0.639	0.0520865	IDO1_Mac
KDM7A-DT	2.14971e-06	0.659047	0.313	0.226	0.0629026	IDO1_Mac
PLEKHF2	2.40599e-06	0.815994	0.344	0.267	0.0704016	IDO1_Mac
AC104695.4	2.7178e-06	0.603236	0.318	0.223	0.0795256	IDO1_Mac
SLC44A1	4.21519e-06	0.725789	0.444	0.366	0.123341	IDO1_Mac
POLE4	5.81276e-06	0.615289	0.324	0.248	0.170087	IDO1_Mac
TTC19	7.08395e-06	0.854486	0.3	0.219	0.207283	IDO1_Mac
BTG3	8.42502e-06	0.6902	0.415	0.343	0.246525	IDO1_Mac
TRABD	1.04713e-05	0.661243	0.353	0.272	0.306399	IDO1_Mac
LYST	1.15397e-05	0.683573	0.261	0.181	0.337664	IDO1_Mac
AC058791.1	1.75964e-05	0.6755	0.302	0.224	0.514888	IDO1_Mac
CDC42EP3	1.99021e-05	0.683167	0.273	0.192	0.582354	IDO1_Mac
VPS37B	2.11109e-05	0.659362	0.374	0.296	0.617725	IDO1_Mac
CCND2	2.38446e-05	0.700392	0.268	0.192	0.697717	IDO1_Mac
REV3L	3.06925e-05	0.663869	0.419	0.358	0.898094	IDO1_Mac
PHTF2	3.12604e-05	0.605818	0.349	0.272	0.914712	IDO1_Mac
CYP2S1	3.28086e-05	0.688718	0.313	0.237	0.960012	IDO1_Mac
AC016831.7	3.79966e-05	0.613249	0.362	0.29	1	IDO1_Mac
BCAS2	3.94357e-05	0.670112	0.396	0.33	1	IDO1_Mac
CCDC59	4.21841e-05	0.684475	0.308	0.238	1	IDO1_Mac
IKZF1	5.95401e-05	0.617255	0.426	0.37	1	IDO1_Mac
TNIP2	6.9931e-05	0.685438	0.291	0.223	1	IDO1_Mac
MIR22HG	7.80944e-05	0.632018	0.338	0.266	1	IDO1_Mac
VASH1	7.98109e-05	0.657101	0.309	0.236	1	IDO1_Mac
ZC3H18	8.53318e-05	0.658927	0.329	0.256	1	IDO1_Mac
EPM2AIP1	8.69353e-05	0.879542	0.263	0.198	1	IDO1_Mac
STK38L	0.000175151	0.860893	0.261	0.199	1	IDO1_Mac
SLCO3A1	0.000230059	0.64692	0.369	0.302	1	IDO1_Mac
ANKRD37	0.000232263	0.715374	0.295	0.228	1	IDO1_Mac
CDK2AP2	0.000291125	0.68591	0.268	0.207	1	IDO1_Mac
MEFV	0.000391437	0.61561	0.29	0.227	1	IDO1_Mac
TP53BP2	0.000424849	0.66084	0.329	0.272	1	IDO1_Mac
ERICH1	0.000454241	0.71634	0.3	0.242	1	IDO1_Mac
ZFAND2A	0.000476606	0.628826	0.317	0.26	1	IDO1_Mac
FBXO34	0.000516503	0.765984	0.254	0.197	1	IDO1_Mac
RAB11FIP1	0.000615566	0.618764	0.383	0.334	1	IDO1_Mac
AC253572.2	0.000925683	0.867851	0.304	0.245	1	IDO1_Mac
AKIRIN1	0.00182403	0.605981	0.417	0.379	1	IDO1_Mac
ARL4A	0.00385347	0.657415	0.32	0.276	1	IDO1_Mac
SLC40A1	7.53703e-135	2.39546	0.804	0.219	2.20541e-130	CCL18_Mac
C2	6.91361e-102	1.74146	0.802	0.283	2.02299e-97	CCL18_Mac
C1QC	1.67641e-97	1.19104	0.998	0.755	4.90534e-93	CCL18_Mac
FOLR2	1.06636e-94	2.04692	0.67	0.187	3.12027e-90	CCL18_Mac
C1QB	1.39901e-93	1.19313	0.998	0.765	4.09364e-89	CCL18_Mac
CD209	2.13525e-93	1.64266	0.777	0.265	6.24795e-89	CCL18_Mac
SLC7A8	1.09532e-92	1.82961	0.616	0.154	3.20503e-88	CCL18_Mac
APOE	5.701e-89	1.67667	0.845	0.37	1.66817e-84	CCL18_Mac
SDC3	1.22223e-86	1.59247	0.724	0.246	3.57637e-82	CCL18_Mac
C1QA	2.98742e-86	1.1601	1	0.773	8.74149e-82	CCL18_Mac
PSAP	1.79645e-84	0.888921	0.998	0.924	5.2566e-80	CCL18_Mac
GPNMB	1.80815e-84	1.45361	0.887	0.399	5.29082e-80	CCL18_Mac
PLTP	9.49664e-83	1.84411	0.641	0.185	2.77881e-78	CCL18_Mac
SLCO2B1	3.00421e-82	1.20263	0.934	0.53	8.79061e-78	CCL18_Mac
LILRB5	3.17059e-80	1.68596	0.664	0.212	9.27745e-76	CCL18_Mac
MSR1	1.20119e-79	1.44029	0.843	0.365	3.51481e-75	CCL18_Mac
LGMN	6.31756e-79	1.42335	0.961	0.665	1.84858e-74	CCL18_Mac
CD163	6.3498e-79	1.26856	0.915	0.445	1.85802e-74	CCL18_Mac
PLD3	4.01054e-78	1.37795	0.924	0.535	1.17352e-73	CCL18_Mac
CTSD	2.00498e-77	1.05625	0.996	0.873	5.86679e-73	CCL18_Mac
APOC1	2.02166e-77	1.31228	0.763	0.302	5.91559e-73	CCL18_Mac
CTSC	6.9081e-75	1.05427	0.99	0.843	2.02138e-70	CCL18_Mac
DAB2	1.32128e-74	1.14189	0.876	0.461	3.8662e-70	CCL18_Mac
CTSB	7.10389e-74	0.881121	0.994	0.95	2.07867e-69	CCL18_Mac
SELENOP	1.17371e-71	2.08645	0.427	0.083	3.4344e-67	CCL18_Mac
FUCA1	1.82839e-71	1.72638	0.616	0.201	5.35004e-67	CCL18_Mac
CTSZ	5.71366e-70	0.834741	0.99	0.872	1.67187e-65	CCL18_Mac
KCNMA1	9.8818e-70	1.56973	0.573	0.174	2.89151e-65	CCL18_Mac
ACE	5.55473e-69	1.63154	0.569	0.171	1.62537e-64	CCL18_Mac
RNASE1	1.28299e-68	1.06303	0.942	0.551	3.75417e-64	CCL18_Mac
MS4A4A	2.14254e-68	1.15036	0.913	0.49	6.26928e-64	CCL18_Mac
GRN	2.18261e-68	0.72684	0.994	0.883	6.38654e-64	CCL18_Mac
CD84	6.64905e-68	1.25675	0.755	0.327	1.94558e-63	CCL18_Mac
FRMD4A	3.06342e-67	1.65129	0.487	0.122	8.96386e-63	CCL18_Mac
CTSS	8.84493e-67	0.714678	0.994	0.916	2.58812e-62	CCL18_Mac
MERTK	1.43062e-65	1.40824	0.662	0.237	4.18613e-61	CCL18_Mac
FCGRT	2.90342e-64	1.03457	0.965	0.738	8.49569e-60	CCL18_Mac
IGSF21	1.19993e-63	2.49902	0.291	0.035	3.51113e-59	CCL18_Mac
LIPA	2.12509e-62	1.27555	0.823	0.427	6.21824e-58	CCL18_Mac
SCARB2	2.35017e-62	0.995432	0.903	0.545	6.87684e-58	CCL18_Mac
FCGR3A	1.12394e-61	0.982841	0.965	0.72	3.28876e-57	CCL18_Mac
TIMP2	4.02252e-60	0.930016	0.938	0.627	1.17703e-55	CCL18_Mac
TTYH3	1.85642e-58	1.04876	0.893	0.56	5.43207e-54	CCL18_Mac
CD163L1	7.37724e-58	2.33582	0.313	0.051	2.15866e-53	CCL18_Mac
LHFPL2	4.77486e-57	1.01971	0.794	0.398	1.39717e-52	CCL18_Mac
TMEM176B	7.97949e-57	0.87091	0.93	0.591	2.33488e-52	CCL18_Mac
ITM2B	1.47728e-55	0.605374	0.998	0.931	4.32266e-51	CCL18_Mac
EPHX1	5.54336e-55	1.9202	0.322	0.059	1.62204e-50	CCL18_Mac
CMKLR1	1.62382e-53	1.251	0.637	0.25	4.75146e-49	CCL18_Mac
STAB1	2.54098e-53	1.05586	0.808	0.426	7.43517e-49	CCL18_Mac
LAMP1	2.19556e-52	0.895677	0.938	0.624	6.42442e-48	CCL18_Mac
ACP5	4.82532e-51	1.08623	0.887	0.589	1.41194e-46	CCL18_Mac
MAF	1.07565e-50	0.867198	0.909	0.56	3.14747e-46	CCL18_Mac
IDH1	2.98095e-50	0.970403	0.66	0.291	8.72257e-46	CCL18_Mac
GPR34	5.79986e-50	1.07905	0.553	0.197	1.6971e-45	CCL18_Mac
CREG1	1.61192e-49	0.733535	0.959	0.692	4.71664e-45	CCL18_Mac
LAPTM5	1.69176e-49	0.604499	0.977	0.912	4.95026e-45	CCL18_Mac
SPRED1	3.39999e-49	1.07597	0.771	0.398	9.94872e-45	CCL18_Mac
SGPP1	5.01268e-49	1.55206	0.466	0.15	1.46676e-44	CCL18_Mac
MFSD1	1.58803e-48	0.823214	0.911	0.607	4.64674e-44	CCL18_Mac
SCPEP1	1.81579e-47	1.05531	0.769	0.432	5.3132e-43	CCL18_Mac
FCHO2	1.99228e-47	0.840398	0.594	0.236	5.82962e-43	CCL18_Mac
TMEM176A	3.09643e-47	0.852171	0.866	0.511	9.06045e-43	CCL18_Mac
CD81	4.69441e-47	0.763024	0.973	0.773	1.37363e-42	CCL18_Mac
TSPAN15	5.52239e-47	1.5674	0.348	0.084	1.61591e-42	CCL18_Mac
ENPP2	1.05691e-46	1.19777	0.647	0.283	3.09262e-42	CCL18_Mac
ABCC5	1.89504e-46	1.53271	0.427	0.128	5.54507e-42	CCL18_Mac
A2M	2.60427e-46	1.1233	0.625	0.269	7.62037e-42	CCL18_Mac
NRP1	2.65729e-46	0.900945	0.862	0.533	7.7755e-42	CCL18_Mac
PLA2G15	1.7555e-45	1.25829	0.41	0.118	5.13677e-41	CCL18_Mac
CCL13	2.60006e-45	1.43458	0.561	0.227	7.60803e-41	CCL18_Mac
TCN2	5.53917e-45	1.04048	0.635	0.27	1.62082e-40	CCL18_Mac
FRMD4B	2.45726e-44	1.07287	0.674	0.31	7.1902e-40	CCL18_Mac
GAL3ST4	2.64125e-44	1.71151	0.299	0.065	7.72857e-40	CCL18_Mac
CD68	3.83494e-44	0.609382	0.977	0.832	1.12214e-39	CCL18_Mac
MPEG1	4.23822e-44	0.800212	0.864	0.525	1.24015e-39	CCL18_Mac
PDGFC	1.42273e-43	1.44674	0.307	0.069	4.16306e-39	CCL18_Mac
IGFBP4	2.35287e-43	1.22104	0.435	0.143	6.88473e-39	CCL18_Mac
ASAH1	2.81423e-43	0.751654	0.938	0.702	8.23471e-39	CCL18_Mac
AKR1B1	5.79208e-43	1.03565	0.637	0.291	1.69482e-38	CCL18_Mac
TSPAN4	7.63106e-43	1.00984	0.571	0.235	2.23293e-38	CCL18_Mac
CD4	2.03921e-42	0.861231	0.866	0.573	5.96694e-38	CCL18_Mac
HEXB	3.39779e-42	0.735508	0.874	0.572	9.94228e-38	CCL18_Mac
BMP2K	5.10064e-42	0.974487	0.788	0.447	1.4925e-37	CCL18_Mac
CD9	2.10081e-41	0.92675	0.81	0.47	6.14718e-37	CCL18_Mac
AP2A2	5.53886e-41	0.826675	0.557	0.228	1.62073e-36	CCL18_Mac
ITGB5	9.32323e-41	1.4469	0.39	0.12	2.72807e-36	CCL18_Mac
GIMAP1	1.23022e-40	1.08721	0.4	0.124	3.59975e-36	CCL18_Mac
SERPING1	1.90049e-40	1.0096	0.784	0.453	5.56103e-36	CCL18_Mac
TREM2	5.4038e-40	1.09107	0.513	0.207	1.58121e-35	CCL18_Mac
CCL18	1.09658e-39	1.93871	0.555	0.243	3.2087e-35	CCL18_Mac
PRNP	2.72554e-39	0.835262	0.821	0.494	7.97521e-35	CCL18_Mac
SCD	4.44274e-39	1.13212	0.476	0.186	1.29999e-34	CCL18_Mac
NR1H3	5.10207e-39	1.34338	0.414	0.141	1.49292e-34	CCL18_Mac
ACP2	5.85485e-39	0.76601	0.621	0.287	1.71319e-34	CCL18_Mac
SASH1	8.95079e-39	0.876429	0.53	0.212	2.61909e-34	CCL18_Mac
C1orf54	9.76625e-39	0.96027	0.584	0.268	2.8577e-34	CCL18_Mac
SIGLEC1	1.33035e-38	0.849519	0.726	0.381	3.89275e-34	CCL18_Mac
SMPDL3A	1.40459e-38	1.16656	0.503	0.19	4.10997e-34	CCL18_Mac
AP1B1	1.45872e-38	0.848165	0.726	0.401	4.26836e-34	CCL18_Mac
TNS3	1.81135e-38	0.878471	0.654	0.313	5.3002e-34	CCL18_Mac
CD59	2.78038e-38	0.757904	0.833	0.524	8.13568e-34	CCL18_Mac
HLA-DOA	3.07548e-38	1.07857	0.53	0.223	8.99916e-34	CCL18_Mac
ME1	3.19729e-38	1.29578	0.258	0.056	9.35559e-34	CCL18_Mac
GIMAP5	2.05477e-37	0.839891	0.606	0.267	6.01246e-33	CCL18_Mac
KCTD12	2.29315e-37	0.662099	0.889	0.584	6.70998e-33	CCL18_Mac
RAP2B	6.13429e-37	0.726797	0.736	0.409	1.79495e-32	CCL18_Mac
NPL	9.34904e-37	0.668767	0.666	0.335	2.73562e-32	CCL18_Mac
GAA	2.26617e-36	0.880792	0.699	0.38	6.63104e-32	CCL18_Mac
RASSF4	5.87604e-36	0.706904	0.757	0.437	1.71939e-31	CCL18_Mac
GNPTAB	6.8526e-36	0.674819	0.728	0.384	2.00514e-31	CCL18_Mac
DNASE2	6.97656e-36	1.06194	0.569	0.261	2.04141e-31	CCL18_Mac
FUCA2	2.10638e-35	1.00667	0.602	0.286	6.16348e-31	CCL18_Mac
LINC01094	5.54547e-35	1.17879	0.369	0.122	1.62266e-30	CCL18_Mac
GPR155	1.57507e-34	1.17504	0.348	0.108	4.6088e-30	CCL18_Mac
IFITM10	3.53203e-34	1.67233	0.295	0.081	1.03351e-29	CCL18_Mac
PLAU	4.50944e-34	0.944059	0.794	0.498	1.31951e-29	CCL18_Mac
LGALS3BP	5.26096e-34	0.735595	0.786	0.464	1.53941e-29	CCL18_Mac
SUCNR1	6.43383e-34	1.22325	0.462	0.19	1.8826e-29	CCL18_Mac
VAT1	2.20709e-33	0.799154	0.429	0.164	6.45815e-29	CCL18_Mac
MMP12	5.10315e-33	0.813554	0.728	0.445	1.49323e-28	CCL18_Mac
MPP1	8.68889e-33	0.631089	0.72	0.394	2.54246e-28	CCL18_Mac
SEMA4A	1.38864e-32	0.830386	0.668	0.35	4.0633e-28	CCL18_Mac
TNFRSF21	2.04559e-32	0.967906	0.48	0.194	5.9856e-28	CCL18_Mac
EGR1	2.99011e-32	0.847031	0.816	0.542	8.74935e-28	CCL18_Mac
VSIG4	3.47668e-32	1.20678	0.439	0.18	1.01731e-27	CCL18_Mac
NAIP	4.25799e-32	0.624193	0.699	0.376	1.24593e-27	CCL18_Mac
LAMP2	4.44452e-32	0.618353	0.891	0.637	1.30051e-27	CCL18_Mac
GIMAP6	4.79113e-32	0.894979	0.346	0.111	1.40193e-27	CCL18_Mac
GASK1B	6.50332e-32	0.931819	0.561	0.26	1.90294e-27	CCL18_Mac
MCOLN1	7.30882e-32	0.88127	0.672	0.362	2.13863e-27	CCL18_Mac
DAPK1	9.44706e-32	0.834533	0.606	0.299	2.7643e-27	CCL18_Mac
SLAMF8	1.09992e-31	0.796867	0.713	0.396	3.21847e-27	CCL18_Mac
GLMP	1.8612e-31	0.806926	0.538	0.245	5.44606e-27	CCL18_Mac
PAQR8	2.67256e-31	1.5123	0.26	0.069	7.82017e-27	CCL18_Mac
RAB3IL1	2.90018e-31	1.12587	0.282	0.078	8.48623e-27	CCL18_Mac
OLFML3	3.05898e-31	1.21559	0.252	0.063	8.95087e-27	CCL18_Mac
FCGR1A	6.21191e-31	0.75307	0.546	0.246	1.81767e-26	CCL18_Mac
SIGLEC12	6.66296e-31	0.936281	0.388	0.141	1.94965e-26	CCL18_Mac
CXCL16	7.09912e-31	0.633064	0.903	0.65	2.07727e-26	CCL18_Mac
COLEC12	9.4442e-31	1.47594	0.353	0.124	2.76347e-26	CCL18_Mac
PLA2G7	1.0875e-30	0.671301	0.891	0.618	3.18213e-26	CCL18_Mac
TMEM87B	1.3626e-30	0.90941	0.464	0.194	3.98709e-26	CCL18_Mac
CTSA	1.39028e-30	0.619535	0.831	0.557	4.06811e-26	CCL18_Mac
COMT	1.93643e-30	0.694234	0.726	0.445	5.6662e-26	CCL18_Mac
NUPR1	2.07578e-30	0.922063	0.27	0.073	6.07395e-26	CCL18_Mac
SEL1L3	2.86632e-30	1.17256	0.318	0.102	8.38713e-26	CCL18_Mac
LAG3	4.87264e-30	1.14883	0.437	0.178	1.42578e-25	CCL18_Mac
FCGR2A	5.90595e-30	0.727609	0.977	0.902	1.72814e-25	CCL18_Mac
CHID1	6.32815e-30	1.15195	0.365	0.13	1.85168e-25	CCL18_Mac
PLXND1	7.51734e-30	0.769556	0.637	0.327	2.19965e-25	CCL18_Mac
SLC36A1	2.33028e-29	1.13784	0.392	0.15	6.81863e-25	CCL18_Mac
ATP6AP2	2.33635e-29	0.640712	0.911	0.662	6.8364e-25	CCL18_Mac
MYO5A	5.30732e-29	0.727386	0.629	0.322	1.55298e-24	CCL18_Mac
SLC38A7	7.14656e-29	1.0397	0.388	0.147	2.09115e-24	CCL18_Mac
EGR2	1.16063e-28	1.34435	0.441	0.201	3.39612e-24	CCL18_Mac
IQGAP2	1.22939e-28	0.65259	0.788	0.487	3.59731e-24	CCL18_Mac
HEXA	1.6e-28	0.617168	0.751	0.457	4.68176e-24	CCL18_Mac
MGAT4A	1.74921e-28	0.817674	0.581	0.291	5.11836e-24	CCL18_Mac
SCP2	8.88271e-28	0.657397	0.705	0.434	2.59917e-23	CCL18_Mac
GNB4	9.646e-28	0.74691	0.72	0.445	2.82252e-23	CCL18_Mac
NCEH1	1.0982e-27	0.80004	0.511	0.241	3.21345e-23	CCL18_Mac
VMO1	1.38621e-27	0.637059	0.67	0.364	4.05619e-23	CCL18_Mac
ITPRIPL2	1.80917e-27	0.779289	0.573	0.293	5.29381e-23	CCL18_Mac
PDIA4	1.91109e-27	0.602249	0.755	0.455	5.59204e-23	CCL18_Mac
OSBPL1A	2.51419e-27	0.796292	0.522	0.244	7.35678e-23	CCL18_Mac
ABHD12	2.59009e-27	0.653069	0.645	0.346	7.57886e-23	CCL18_Mac
ITGA9	4.11626e-27	1.16194	0.307	0.103	1.20446e-22	CCL18_Mac
ECM1	4.23779e-27	1.26193	0.301	0.099	1.24002e-22	CCL18_Mac
FOS	5.01784e-27	0.666435	0.918	0.773	1.46827e-22	CCL18_Mac
NHLRC3	5.65611e-27	0.793518	0.431	0.182	1.65504e-22	CCL18_Mac
PDCD1LG2	6.13954e-27	1.03993	0.328	0.115	1.79649e-22	CCL18_Mac
TMIGD3	6.53169e-27	1.46104	0.282	0.092	1.91124e-22	CCL18_Mac
RBP1	1.2246e-26	0.855095	0.326	0.118	3.58331e-22	CCL18_Mac
LACC1	1.31406e-26	0.693765	0.631	0.341	3.84508e-22	CCL18_Mac
ABCG1	1.65283e-26	0.682962	0.606	0.314	4.83636e-22	CCL18_Mac
UNC93B1	1.71635e-26	0.661977	0.641	0.367	5.02222e-22	CCL18_Mac
RTN3	1.83301e-26	0.63651	0.666	0.378	5.36356e-22	CCL18_Mac
GM2A	2.95544e-26	0.671164	0.788	0.52	8.64791e-22	CCL18_Mac
ADAM9	3.32096e-26	0.651043	0.769	0.479	9.71746e-22	CCL18_Mac
PRCP	5.07168e-26	0.941143	0.513	0.257	1.48402e-21	CCL18_Mac
ENG	5.07401e-26	0.787423	0.66	0.372	1.48471e-21	CCL18_Mac
OLFML2B	6.73477e-26	0.81495	0.664	0.376	1.97066e-21	CCL18_Mac
SLC31A1	6.79099e-26	0.811795	0.569	0.306	1.98711e-21	CCL18_Mac
ME2	7.81091e-26	0.726458	0.586	0.306	2.28555e-21	CCL18_Mac
SLC38A6	9.15048e-26	0.908217	0.34	0.127	2.67752e-21	CCL18_Mac
HES1	1.21773e-25	0.75259	0.604	0.344	3.56319e-21	CCL18_Mac
PLBD2	2.46331e-25	0.615385	0.515	0.24	7.20791e-21	CCL18_Mac
ST6GAL1	3.26185e-25	1.01822	0.299	0.103	9.54449e-21	CCL18_Mac
LPAR6	3.77936e-25	0.624895	0.664	0.374	1.10588e-20	CCL18_Mac
CCND1	6.4233e-25	0.845434	0.303	0.108	1.87952e-20	CCL18_Mac
MKNK1	7.66656e-25	0.606465	0.629	0.346	2.24331e-20	CCL18_Mac
GOLIM4	8.81381e-25	0.773752	0.495	0.236	2.57901e-20	CCL18_Mac
ARPIN	1.23877e-24	0.657391	0.441	0.197	3.62478e-20	CCL18_Mac
APPL2	1.29608e-24	1.5871	0.264	0.086	3.79245e-20	CCL18_Mac
VOPP1	3.18257e-24	0.639116	0.631	0.349	9.31253e-20	CCL18_Mac
MRC1	3.45602e-24	0.626937	0.891	0.626	1.01127e-19	CCL18_Mac
PRKACB	3.48149e-24	0.828956	0.328	0.125	1.01872e-19	CCL18_Mac
PYGL	3.60865e-24	0.701672	0.427	0.188	1.05593e-19	CCL18_Mac
SGPL1	3.80172e-24	0.636683	0.678	0.411	1.11242e-19	CCL18_Mac
ANKFY1	4.34884e-24	0.977321	0.392	0.169	1.27251e-19	CCL18_Mac
PDPN	4.95112e-24	0.787913	0.437	0.196	1.44875e-19	CCL18_Mac
RNF135	5.08789e-24	0.804704	0.311	0.115	1.48877e-19	CCL18_Mac
METTL7A	8.5396e-24	1.0649	0.303	0.11	2.49877e-19	CCL18_Mac
SLC35F6	1.2499e-23	0.93245	0.4	0.177	3.65732e-19	CCL18_Mac
HVCN1	1.36949e-23	0.736422	0.419	0.186	4.00728e-19	CCL18_Mac
NAGLU	1.49411e-23	0.966764	0.285	0.101	4.37193e-19	CCL18_Mac
ETV5	1.95785e-23	0.622231	0.511	0.257	5.72886e-19	CCL18_Mac
SMIM30	2.82393e-23	0.631707	0.518	0.269	8.26311e-19	CCL18_Mac
ATF6	3.7492e-23	0.658816	0.606	0.328	1.09705e-18	CCL18_Mac
LRRC25	3.94488e-23	0.600169	0.503	0.246	1.15431e-18	CCL18_Mac
FAM20A	4.94329e-23	0.973465	0.272	0.093	1.44646e-18	CCL18_Mac
NFE2L1	5.65408e-23	0.780188	0.476	0.234	1.65444e-18	CCL18_Mac
NFAM1	6.00939e-23	0.839366	0.41	0.18	1.75841e-18	CCL18_Mac
INPP5D	9.02753e-23	0.744193	0.456	0.22	2.64155e-18	CCL18_Mac
CHD9	9.99751e-23	0.615283	0.575	0.305	2.92537e-18	CCL18_Mac
NAGA	1.08245e-22	0.736486	0.608	0.346	3.16735e-18	CCL18_Mac
TMEM19	1.26368e-22	0.774444	0.348	0.139	3.69767e-18	CCL18_Mac
RDH11	1.46684e-22	0.750063	0.402	0.179	4.29213e-18	CCL18_Mac
SLC17A5	1.47277e-22	0.773552	0.34	0.136	4.30948e-18	CCL18_Mac
NEU1	1.67515e-22	0.622504	0.654	0.379	4.90166e-18	CCL18_Mac
WWP1	2.0827e-22	1.12533	0.379	0.172	6.09418e-18	CCL18_Mac
GIMAP2	2.26359e-22	1.11329	0.27	0.095	6.62349e-18	CCL18_Mac
SCCPDH	3.0122e-22	0.80639	0.326	0.128	8.81401e-18	CCL18_Mac
TCF12	4.07382e-22	0.637097	0.427	0.196	1.19204e-17	CCL18_Mac
GADD45G	4.71294e-22	0.897436	0.406	0.19	1.37905e-17	CCL18_Mac
ANKH	8.09312e-22	0.805326	0.53	0.284	2.36813e-17	CCL18_Mac
GNPDA1	9.68745e-22	0.655761	0.557	0.306	2.83465e-17	CCL18_Mac
RCAN1	9.94681e-22	1.02919	0.577	0.334	2.91054e-17	CCL18_Mac
SPPL3	1.03697e-21	1.02791	0.4	0.183	3.03427e-17	CCL18_Mac
GLB1	1.1534e-21	0.68919	0.513	0.264	3.37497e-17	CCL18_Mac
APOL6	1.22373e-21	0.641639	0.676	0.413	3.58075e-17	CCL18_Mac
CXCL9	1.39735e-21	1.19192	0.485	0.257	4.08879e-17	CCL18_Mac
SLC4A7	1.74071e-21	0.712822	0.507	0.263	5.09349e-17	CCL18_Mac
MGME1	2.39123e-21	0.904091	0.307	0.12	6.99698e-17	CCL18_Mac
NADK	5.65512e-21	0.656411	0.489	0.246	1.65474e-16	CCL18_Mac
TBC1D9	5.86127e-21	0.715857	0.398	0.179	1.71507e-16	CCL18_Mac
ADAMDEC1	6.82744e-21	1.38881	0.297	0.122	1.99778e-16	CCL18_Mac
GIMAP8	1.71081e-20	0.767549	0.33	0.136	5.00599e-16	CCL18_Mac
JUN	2.68175e-20	0.603603	0.882	0.734	7.84706e-16	CCL18_Mac
ATP6V0A1	4.07498e-20	0.673204	0.524	0.287	1.19238e-15	CCL18_Mac
BMPR2	4.74003e-20	0.698813	0.452	0.224	1.38698e-15	CCL18_Mac
CLN8	6.67969e-20	0.630602	0.52	0.275	1.95454e-15	CCL18_Mac
ITSN1	1.00733e-19	1.07608	0.258	0.094	2.94754e-15	CCL18_Mac
TNFAIP8L2	1.76247e-19	0.618096	0.258	0.092	5.15715e-15	CCL18_Mac
KCNE3	1.88648e-19	0.793166	0.28	0.109	5.52002e-15	CCL18_Mac
HPSE	2.08448e-19	0.678773	0.431	0.21	6.09939e-15	CCL18_Mac
NR4A2	2.93386e-19	0.622106	0.868	0.748	8.58476e-15	CCL18_Mac
EPHB2	3.22628e-19	0.972863	0.276	0.108	9.44043e-15	CCL18_Mac
ABI3	3.30559e-19	0.67772	0.522	0.282	9.6725e-15	CCL18_Mac
PHF3	3.53618e-19	0.722015	0.54	0.29	1.03472e-14	CCL18_Mac
FLVCR2	4.83166e-19	0.718188	0.355	0.159	1.41379e-14	CCL18_Mac
PARP1	6.33431e-19	0.639797	0.435	0.219	1.85348e-14	CCL18_Mac
SLC39A11	6.76391e-19	0.762911	0.381	0.18	1.97919e-14	CCL18_Mac
TDP2	7.99225e-19	0.620861	0.454	0.235	2.33861e-14	CCL18_Mac
SPIN1	9.02288e-19	0.606951	0.332	0.143	2.64018e-14	CCL18_Mac
GDE1	1.05945e-18	0.948874	0.363	0.174	3.10004e-14	CCL18_Mac
CREBRF	1.42037e-18	0.630542	0.649	0.402	4.15615e-14	CCL18_Mac
CHCHD10	1.43704e-18	0.610625	0.538	0.31	4.20492e-14	CCL18_Mac
B3GNT7	1.46983e-18	0.791018	0.307	0.13	4.30086e-14	CCL18_Mac
STARD3	1.48169e-18	0.751487	0.361	0.167	4.33557e-14	CCL18_Mac
ATP10D	1.58142e-18	0.899709	0.27	0.106	4.62738e-14	CCL18_Mac
UGCG	1.58532e-18	0.648871	0.526	0.292	4.6388e-14	CCL18_Mac
GCLC	1.92501e-18	1.00906	0.27	0.108	5.63277e-14	CCL18_Mac
CCPG1	2.09062e-18	0.651863	0.503	0.27	6.11736e-14	CCL18_Mac
TPD52	2.35779e-18	0.726184	0.324	0.141	6.89912e-14	CCL18_Mac
PEAK1	2.8136e-18	0.716943	0.375	0.176	8.23287e-14	CCL18_Mac
GPX3	2.85231e-18	0.781699	0.375	0.181	8.34614e-14	CCL18_Mac
PTGR1	3.0532e-18	1.16692	0.252	0.096	8.93397e-14	CCL18_Mac
TLR8	3.5643e-18	0.731484	0.396	0.193	1.04295e-13	CCL18_Mac
CITED2	3.73262e-18	0.749891	0.59	0.358	1.0922e-13	CCL18_Mac
APC	4.5544e-18	0.806223	0.394	0.191	1.33266e-13	CCL18_Mac
NISCH	6.37924e-18	0.860935	0.336	0.152	1.86663e-13	CCL18_Mac
KCNQ1OT1	6.51546e-18	0.965044	0.614	0.41	1.90649e-13	CCL18_Mac
PROCR	1.33347e-17	0.92683	0.334	0.155	3.90187e-13	CCL18_Mac
KCNE1	1.42271e-17	0.935887	0.309	0.134	4.163e-13	CCL18_Mac
EEA1	1.57143e-17	0.60135	0.447	0.232	4.59815e-13	CCL18_Mac
SIGLEC10	1.95478e-17	0.783647	0.464	0.246	5.71988e-13	CCL18_Mac
DNASE1L1	2.37573e-17	0.607402	0.285	0.118	6.95162e-13	CCL18_Mac
HACD3	2.73182e-17	0.66306	0.282	0.12	7.99357e-13	CCL18_Mac
HOMER3	3.17171e-17	0.600051	0.301	0.129	9.28073e-13	CCL18_Mac
TM6SF1	3.28709e-17	0.794209	0.309	0.137	9.61836e-13	CCL18_Mac
FLI1	3.84695e-17	0.834062	0.353	0.167	1.12565e-12	CCL18_Mac
SLC33A1	4.52139e-17	0.797579	0.301	0.132	1.323e-12	CCL18_Mac
ATG4C	5.24432e-17	0.861983	0.258	0.103	1.53454e-12	CCL18_Mac
DMXL1	9.18473e-17	0.628657	0.377	0.186	2.68754e-12	CCL18_Mac
CTSO	1.39474e-16	0.796643	0.252	0.099	4.08114e-12	CCL18_Mac
SUMF2	1.44457e-16	0.747798	0.373	0.184	4.22695e-12	CCL18_Mac
TRPV2	1.4734e-16	0.626376	0.454	0.242	4.31131e-12	CCL18_Mac
BSCL2	1.79201e-16	0.685799	0.28	0.121	5.2436e-12	CCL18_Mac
DNAJC14	1.95527e-16	0.78954	0.303	0.137	5.72132e-12	CCL18_Mac
ARMCX1	2.6575e-16	0.712153	0.311	0.139	7.77611e-12	CCL18_Mac
TGFBR2	3.77703e-16	0.637059	0.493	0.281	1.1052e-11	CCL18_Mac
COPS7A	3.83475e-16	0.721532	0.291	0.128	1.12209e-11	CCL18_Mac
CPNE8	5.01169e-16	0.844003	0.285	0.124	1.46647e-11	CCL18_Mac
TMEM251	6.37384e-16	0.617291	0.348	0.167	1.86505e-11	CCL18_Mac
SLC49A4	7.12107e-16	0.762707	0.264	0.109	2.0837e-11	CCL18_Mac
ERRFI1	7.48996e-16	0.676159	0.433	0.235	2.19164e-11	CCL18_Mac
LPCAT3	7.60203e-16	0.809112	0.272	0.117	2.22443e-11	CCL18_Mac
GAS7	9.0066e-16	0.831918	0.285	0.127	2.63542e-11	CCL18_Mac
FAM98B	9.45402e-16	0.789791	0.254	0.103	2.76634e-11	CCL18_Mac
APOL1	1.29444e-15	0.936692	0.254	0.106	3.78766e-11	CCL18_Mac
TM7SF3	1.37671e-15	0.693121	0.311	0.144	4.02838e-11	CCL18_Mac
SP1	1.75555e-15	0.729263	0.28	0.123	5.13692e-11	CCL18_Mac
CDS2	1.77182e-15	0.67313	0.342	0.169	5.18452e-11	CCL18_Mac
RPE	1.8255e-15	0.613492	0.299	0.135	5.3416e-11	CCL18_Mac
SLC45A4	2.08761e-15	0.882392	0.252	0.105	6.10855e-11	CCL18_Mac
CBLB	2.84935e-15	0.602921	0.309	0.143	8.33748e-11	CCL18_Mac
TLR1	3.59776e-15	0.665036	0.377	0.196	1.05274e-10	CCL18_Mac
CPED1	5.72094e-15	1.14657	0.262	0.115	1.674e-10	CCL18_Mac
EXOC1	7.25891e-15	0.620311	0.412	0.219	2.12403e-10	CCL18_Mac
MBNL2	7.95776e-15	0.643291	0.336	0.163	2.32852e-10	CCL18_Mac
CD38	8.87807e-15	0.639919	0.311	0.147	2.59781e-10	CCL18_Mac
ARSA	1.57338e-14	0.639837	0.379	0.197	4.60386e-10	CCL18_Mac
GGA2	1.68129e-14	0.624875	0.408	0.218	4.91963e-10	CCL18_Mac
GIT2	2.11793e-14	0.601366	0.398	0.217	6.19729e-10	CCL18_Mac
ROCK2	2.78559e-14	0.830074	0.375	0.197	8.1509e-10	CCL18_Mac
SECISBP2L	3.12871e-14	0.674128	0.363	0.188	9.15492e-10	CCL18_Mac
RASAL2	3.44592e-14	0.782297	0.293	0.14	1.00831e-09	CCL18_Mac
RENBP	4.02051e-14	0.699235	0.33	0.165	1.17644e-09	CCL18_Mac
AMFR	9.09016e-14	0.684118	0.254	0.113	2.65987e-09	CCL18_Mac
CEPT1	1.27715e-13	0.771913	0.266	0.121	3.73708e-09	CCL18_Mac
ZNF330	1.56953e-13	0.679122	0.336	0.171	4.59261e-09	CCL18_Mac
TANC2	1.59127e-13	0.708918	0.274	0.128	4.65621e-09	CCL18_Mac
FAM3C	1.78593e-13	0.630945	0.344	0.174	5.22581e-09	CCL18_Mac
TOR4A	3.07025e-13	0.651508	0.301	0.147	8.98385e-09	CCL18_Mac
PTPRO	4.23003e-13	0.628988	0.256	0.116	1.23775e-08	CCL18_Mac
SLC25A44	5.29989e-13	0.683748	0.386	0.216	1.5508e-08	CCL18_Mac
ZMYND8	6.03626e-13	0.821147	0.357	0.191	1.76627e-08	CCL18_Mac
F13A1	7.2478e-13	0.967492	0.357	0.196	2.12078e-08	CCL18_Mac
MTR	8.71596e-13	0.734091	0.309	0.158	2.55038e-08	CCL18_Mac
PIGS	9.3311e-13	0.700478	0.295	0.144	2.73037e-08	CCL18_Mac
TMEM106B	9.97633e-13	0.645097	0.254	0.117	2.91917e-08	CCL18_Mac
MOSPD2	1.15442e-12	0.663699	0.307	0.155	3.37795e-08	CCL18_Mac
PLOD1	1.96261e-12	0.685969	0.295	0.15	5.74278e-08	CCL18_Mac
CD2AP	2.31879e-12	0.610109	0.392	0.223	6.785e-08	CCL18_Mac
GALNT7	2.88747e-12	0.708201	0.266	0.128	8.44903e-08	CCL18_Mac
BAIAP2	5.44962e-12	0.631572	0.4	0.23	1.59461e-07	CCL18_Mac
GALC	5.55387e-12	0.764918	0.32	0.168	1.62512e-07	CCL18_Mac
RIC8A	6.04606e-12	0.618395	0.262	0.128	1.76914e-07	CCL18_Mac
ST14	6.10015e-12	0.707279	0.419	0.246	1.78497e-07	CCL18_Mac
TMCO3	1.35593e-11	0.873924	0.28	0.143	3.96759e-07	CCL18_Mac
ARFIP1	1.41694e-11	0.682029	0.264	0.132	4.14612e-07	CCL18_Mac
MYO9A	2.71281e-11	0.642897	0.268	0.133	7.93794e-07	CCL18_Mac
BFAR	4.3084e-11	0.64309	0.266	0.133	1.26068e-06	CCL18_Mac
MFSD4B	5.77409e-11	0.679456	0.303	0.163	1.68956e-06	CCL18_Mac
ZDHHC7	1.09238e-10	0.637372	0.276	0.144	3.19643e-06	CCL18_Mac
RIPOR1	1.16087e-10	0.762451	0.289	0.155	3.39682e-06	CCL18_Mac
TAF3	2.46504e-10	0.810437	0.264	0.135	7.21297e-06	CCL18_Mac
ANKRD40	2.75033e-10	0.680993	0.254	0.13	8.04773e-06	CCL18_Mac
SLC39A10	3.08484e-10	0.630657	0.295	0.161	9.02656e-06	CCL18_Mac
NAXE	4.87487e-10	0.675588	0.276	0.147	1.42643e-05	CCL18_Mac
LCORL	5.02453e-10	0.693711	0.307	0.17	1.47023e-05	CCL18_Mac
STX17	1.81007e-09	0.628097	0.338	0.201	5.29643e-05	CCL18_Mac
ABHD5	4.20676e-09	0.636628	0.429	0.278	0.000123094	CCL18_Mac
DESI2	4.66877e-09	0.668116	0.285	0.16	0.000136613	CCL18_Mac
USP24	6.82569e-09	0.602865	0.268	0.147	0.000199726	CCL18_Mac
MRPL12	2.29784e-08	0.62125	0.258	0.146	0.00067237	CCL18_Mac
EI24	3.96366e-08	0.608594	0.254	0.143	0.00115981	CCL18_Mac
AP1AR	6.21256e-08	0.61443	0.256	0.146	0.00181786	CCL18_Mac
CTSL	5.38228e-39	1.01871	0.982	0.803	1.57491e-34	CCL2_Mac
GPNMB	1.48612e-30	0.85651	0.809	0.456	4.34854e-26	CCL2_Mac
RCAN1	1.99436e-28	1.17977	0.652	0.342	5.83569e-24	CCL2_Mac
CCL4	3.85464e-28	0.810618	0.969	0.812	1.12791e-23	CCL2_Mac
CCL3	4.53692e-26	0.666433	0.982	0.837	1.32755e-21	CCL2_Mac
RNASE1	2.04134e-25	0.808343	0.929	0.588	5.97316e-21	CCL2_Mac
CXCL3	2.76478e-25	0.684204	0.951	0.787	8.09003e-21	CCL2_Mac
LAMP1	1.18389e-24	0.634002	0.911	0.657	3.46417e-20	CCL2_Mac
LUCAT1	2.93599e-23	0.94241	0.84	0.616	8.591e-19	CCL2_Mac
CXCL1	3.95737e-21	0.778766	0.828	0.602	1.15797e-16	CCL2_Mac
C5AR1	1.07015e-20	0.649446	0.902	0.692	3.13138e-16	CCL2_Mac
TNF	1.73695e-20	0.80342	0.849	0.633	5.0825e-16	CCL2_Mac
CXCL2	1.84049e-20	0.630413	0.966	0.819	5.38547e-16	CCL2_Mac
CCL3L1	2.59942e-20	0.641969	0.892	0.714	7.60616e-16	CCL2_Mac
SLC11A1	2.90182e-20	0.688335	0.76	0.476	8.49103e-16	CCL2_Mac
MSR1	3.75491e-20	0.689212	0.717	0.43	1.09872e-15	CCL2_Mac
TSC22D1	1.34311e-19	0.743703	0.594	0.327	3.93008e-15	CCL2_Mac
CCL20	3.12797e-19	0.633184	0.763	0.5	9.15274e-15	CCL2_Mac
PLIN2	5.8477e-19	0.800966	0.738	0.526	1.71109e-14	CCL2_Mac
MMP19	3.78441e-18	0.818044	0.686	0.446	1.10736e-13	CCL2_Mac
PLAU	5.55963e-18	0.647481	0.791	0.525	1.6268e-13	CCL2_Mac
CCL2	1.65685e-17	1.20363	0.52	0.292	4.84811e-13	CCL2_Mac
ABCA1	1.9138e-16	0.601274	0.895	0.751	5.59996e-12	CCL2_Mac
MRC1	3.78952e-16	0.608681	0.874	0.653	1.10885e-11	CCL2_Mac
CCL4L2	3.87099e-16	0.653132	0.865	0.677	1.13269e-11	CCL2_Mac
ARID5B	8.24053e-16	0.785097	0.686	0.471	2.41126e-11	CCL2_Mac
SDC2	7.6979e-15	0.659051	0.603	0.372	2.25248e-10	CCL2_Mac
SNX10	1.28878e-13	0.605113	0.797	0.611	3.7711e-09	CCL2_Mac
CXCL5	6.34904e-13	0.796409	0.363	0.184	1.85779e-08	CCL2_Mac
MAPK13	1.28609e-12	0.987289	0.394	0.212	3.76323e-08	CCL2_Mac
CD209	1.47951e-12	0.662953	0.56	0.35	4.3292e-08	CCL2_Mac
CCL8	2.15864e-12	1.55912	0.372	0.21	6.3164e-08	CCL2_Mac
PDPN	2.34159e-12	0.934465	0.403	0.223	6.85173e-08	CCL2_Mac
SPP1	2.45517e-12	0.937033	0.468	0.279	7.18408e-08	CCL2_Mac
ATP6V1H	9.59679e-12	0.616517	0.643	0.448	2.80812e-07	CCL2_Mac
ERRFI1	1.3308e-11	0.98097	0.431	0.253	3.89405e-07	CCL2_Mac
ITGA5	1.42986e-11	0.672213	0.542	0.34	4.18391e-07	CCL2_Mac
PLEKHM2	3.81845e-11	0.708901	0.498	0.323	1.11732e-06	CCL2_Mac
TDP2	6.50452e-11	0.69517	0.437	0.258	1.90329e-06	CCL2_Mac
NPC1	9.96224e-11	0.77877	0.48	0.304	2.91505e-06	CCL2_Mac
MERTK	1.37575e-10	0.71235	0.486	0.307	4.02559e-06	CCL2_Mac
SLC11A2	2.12135e-10	0.665127	0.597	0.426	6.20727e-06	CCL2_Mac
ACOD1	2.58063e-10	1.00495	0.329	0.182	7.55119e-06	CCL2_Mac
SDS	2.65655e-10	0.625847	0.44	0.264	7.77333e-06	CCL2_Mac
ECM1	3.35657e-10	1.02413	0.258	0.125	9.82165e-06	CCL2_Mac
TLNRD1	3.96368e-10	0.775845	0.495	0.326	1.15981e-05	CCL2_Mac
MMP12	4.42483e-10	0.725366	0.649	0.485	1.29475e-05	CCL2_Mac
SIGLEC1	5.9704e-10	0.634487	0.615	0.432	1.747e-05	CCL2_Mac
LRP12	6.39082e-10	0.902739	0.357	0.205	1.87002e-05	CCL2_Mac
MGLL	1.07833e-09	0.943421	0.268	0.135	3.15531e-05	CCL2_Mac
VAV3	2.01056e-09	0.62427	0.415	0.255	5.88309e-05	CCL2_Mac
OSCAR	4.60271e-09	0.633349	0.418	0.269	0.00013468	CCL2_Mac
MITF	7.80669e-09	0.80551	0.372	0.225	0.000228432	CCL2_Mac
NCSTN	1.14135e-08	0.67665	0.483	0.329	0.00033397	CCL2_Mac
TGM2	1.16276e-08	0.678814	0.425	0.272	0.000340235	CCL2_Mac
PHLDA1	1.25637e-08	0.656942	0.658	0.539	0.000367628	CCL2_Mac
DENND2D	1.69719e-08	0.857282	0.283	0.157	0.000496614	CCL2_Mac
FBXL5	1.83037e-08	0.797476	0.403	0.257	0.000535585	CCL2_Mac
HOMER3	2.77514e-08	0.672242	0.277	0.149	0.000812035	CCL2_Mac
CCPG1	3.56455e-08	0.632988	0.458	0.299	0.00104302	CCL2_Mac
BCL11A	4.38839e-08	0.662854	0.446	0.297	0.00128409	CCL2_Mac
SLC36A1	1.0177e-07	0.870026	0.314	0.186	0.00297788	CCL2_Mac
COLEC12	1.355e-07	0.852859	0.28	0.158	0.00396487	CCL2_Mac
FAM20C	2.60892e-07	0.831608	0.262	0.147	0.00763397	CCL2_Mac
SGMS1	2.83296e-07	0.749009	0.332	0.204	0.00828953	CCL2_Mac
TATDN2	3.78817e-07	0.604106	0.332	0.203	0.0110846	CCL2_Mac
AP5B1	4.19337e-07	0.847178	0.283	0.17	0.0122702	CCL2_Mac
ITGB5	5.977e-07	0.735608	0.28	0.164	0.0174893	CCL2_Mac
LATS2	7.02184e-07	0.684318	0.412	0.28	0.0205466	CCL2_Mac
SLC1A3	7.74145e-07	0.708756	0.283	0.167	0.0226523	CCL2_Mac
RASGRP3	1.57861e-06	0.834718	0.415	0.297	0.0461918	CCL2_Mac
MCTP1	2.45236e-06	0.606139	0.508	0.379	0.0717584	CCL2_Mac
AL078604.2	3.01803e-06	0.766966	0.32	0.199	0.0883107	CCL2_Mac
EPAS1	3.35275e-06	0.608397	0.335	0.219	0.0981049	CCL2_Mac
LINC00847	4.06176e-06	0.625473	0.397	0.272	0.118851	CCL2_Mac
SAMD4A	8.09391e-06	0.802074	0.255	0.155	0.236836	CCL2_Mac
PIK3CA	1.59508e-05	0.940498	0.271	0.168	0.466735	CCL2_Mac
HS3ST1	1.68397e-05	0.60896	0.311	0.204	0.492748	CCL2_Mac
PCSK5	2.09405e-05	0.87149	0.252	0.155	0.612739	CCL2_Mac
PHF19	2.19605e-05	0.680859	0.342	0.235	0.642585	CCL2_Mac
ARMT1	3.16904e-05	0.623134	0.332	0.227	0.927294	CCL2_Mac
CREB3L2	3.30829e-05	0.646124	0.308	0.203	0.968039	CCL2_Mac
GPR107	6.54481e-05	0.696798	0.338	0.238	1	CCL2_Mac
GALNT6	7.16607e-05	0.640618	0.314	0.212	1	CCL2_Mac
GIMAP8	0.000178144	0.601468	0.252	0.167	1	CCL2_Mac
NUS1	0.000259215	0.66475	0.317	0.232	1	CCL2_Mac
WASHC2A	0.000419388	0.668672	0.274	0.189	1	CCL2_Mac
MDM2	0.00042852	0.652705	0.449	0.352	1	CCL2_Mac
RNF139	0.000915753	0.67495	0.262	0.181	1	CCL2_Mac
GDE1	0.0096429	0.608558	0.274	0.207	1	CCL2_Mac
CALHM6	1.14165e-25	1.04547	0.908	0.61	3.34059e-21	CXCL10_Mac
FGL2	1.09505e-23	0.717401	0.968	0.735	3.20423e-19	CXCL10_Mac
CDC42EP2	2.64404e-22	1.1744	0.507	0.204	7.73672e-18	CXCL10_Mac
CYBB	5.02371e-20	0.628579	0.954	0.758	1.46999e-15	CXCL10_Mac
MS4A6A	1.49085e-18	0.600024	0.954	0.748	4.36237e-14	CXCL10_Mac
CXCL10	2.39666e-15	1.14279	0.622	0.376	7.01287e-11	CXCL10_Mac
EPSTI1	1.34967e-14	0.640726	0.857	0.612	3.94928e-10	CXCL10_Mac
TNFSF10	3.41442e-14	1.02178	0.733	0.503	9.99092e-10	CXCL10_Mac
AOAH	5.59039e-14	0.891212	0.585	0.358	1.6358e-09	CXCL10_Mac
LGALS2	7.69369e-14	1.19932	0.498	0.265	2.25125e-09	CXCL10_Mac
ENPP2	1.97879e-13	0.828033	0.59	0.341	5.79015e-09	CXCL10_Mac
CXCL9	4.14942e-13	0.896104	0.521	0.285	1.21416e-08	CXCL10_Mac
NRG1	5.08694e-13	0.873181	0.419	0.198	1.48849e-08	CXCL10_Mac
VAMP5	5.72375e-13	0.754612	0.659	0.425	1.67483e-08	CXCL10_Mac
LILRB2	9.93991e-13	0.602566	0.82	0.628	2.90852e-08	CXCL10_Mac
ANKRD22	1.32168e-12	0.872496	0.525	0.302	3.86736e-08	CXCL10_Mac
NMI	1.56813e-12	0.634991	0.59	0.351	4.58852e-08	CXCL10_Mac
SELENOK	2.22886e-12	0.649891	0.839	0.678	6.52186e-08	CXCL10_Mac
HES4	4.53677e-12	0.748682	0.779	0.584	1.3275e-07	CXCL10_Mac
IFIH1	5.56931e-11	0.699623	0.724	0.509	1.62963e-06	CXCL10_Mac
UBAC2	7.65814e-11	0.652647	0.71	0.484	2.24085e-06	CXCL10_Mac
MEFV	1.7003e-10	0.854198	0.415	0.224	4.97525e-06	CXCL10_Mac
ITGB7	1.94434e-10	0.800955	0.429	0.237	5.68935e-06	CXCL10_Mac
TAGAP	3.17774e-10	0.648759	0.687	0.469	9.29838e-06	CXCL10_Mac
IFIT2	3.9602e-10	0.967435	0.622	0.442	1.15879e-05	CXCL10_Mac
ISG15	4.80313e-10	0.666123	0.968	0.852	1.40544e-05	CXCL10_Mac
BLVRA	9.99623e-10	0.602116	0.571	0.369	2.925e-05	CXCL10_Mac
SDF2L1	1.20014e-09	0.727731	0.604	0.427	3.51174e-05	CXCL10_Mac
GZF1	1.98567e-09	0.734588	0.438	0.251	5.81026e-05	CXCL10_Mac
PDGFB	2.44942e-09	1.13114	0.401	0.231	7.16725e-05	CXCL10_Mac
ZC3HAV1	2.51034e-09	0.70445	0.719	0.533	7.34551e-05	CXCL10_Mac
SIGLEC10	2.6891e-09	0.772494	0.465	0.277	7.86859e-05	CXCL10_Mac
SAMD9L	4.86438e-09	0.619119	0.705	0.496	0.000142336	CXCL10_Mac
HS3ST1	5.73521e-09	0.951629	0.373	0.203	0.000167818	CXCL10_Mac
IRF7	6.21588e-09	0.687326	0.645	0.453	0.000181883	CXCL10_Mac
APOBEC3A	1.06498e-08	0.995967	0.336	0.178	0.000311625	CXCL10_Mac
IL6	1.25183e-08	0.619731	0.71	0.524	0.000366297	CXCL10_Mac
PMVK	2.53418e-08	0.867674	0.3	0.156	0.000741526	CXCL10_Mac
HIVEP3	2.77302e-08	0.720008	0.332	0.177	0.000811413	CXCL10_Mac
RSAD2	6.15386e-08	0.749285	0.516	0.339	0.00180068	CXCL10_Mac
JMY	8.3763e-08	0.892944	0.41	0.248	0.00245099	CXCL10_Mac
NAPRT	8.99491e-08	0.79639	0.378	0.226	0.002632	CXCL10_Mac
HERC5	9.90752e-08	0.756587	0.415	0.25	0.00289904	CXCL10_Mac
RIN2	1.37091e-07	0.6176	0.53	0.353	0.00401142	CXCL10_Mac
DNAAF1	1.49844e-07	1.06688	0.327	0.182	0.00438458	CXCL10_Mac
GSDMD	1.63619e-07	0.69586	0.415	0.251	0.00478765	CXCL10_Mac
MGST2	2.57166e-07	0.63748	0.465	0.291	0.00752494	CXCL10_Mac
PSTPIP2	2.69689e-07	0.767533	0.359	0.212	0.00789136	CXCL10_Mac
CEACAM4	2.77641e-07	0.823597	0.29	0.151	0.00812405	CXCL10_Mac
TWISTNB	3.78357e-07	0.609647	0.465	0.302	0.0110711	CXCL10_Mac
WASHC3	5.96924e-07	0.704776	0.378	0.229	0.0174666	CXCL10_Mac
TCF4	6.78628e-07	0.641707	0.525	0.375	0.0198573	CXCL10_Mac
TPGS1	7.15689e-07	0.765784	0.3	0.168	0.0209418	CXCL10_Mac
RBBP8	1.09647e-06	0.680818	0.447	0.286	0.0320839	CXCL10_Mac
PRMT9	1.45124e-06	0.724948	0.41	0.266	0.0424646	CXCL10_Mac
CISD1	1.45571e-06	0.677068	0.263	0.139	0.0425957	CXCL10_Mac
IFIT1	1.46665e-06	0.718947	0.53	0.359	0.0429157	CXCL10_Mac
RGS18	1.60621e-06	0.641643	0.438	0.282	0.0469993	CXCL10_Mac
ANKRD37	1.98266e-06	0.655686	0.369	0.231	0.0580147	CXCL10_Mac
SECTM1	2.16929e-06	0.617295	0.484	0.322	0.0634756	CXCL10_Mac
AC253572.2	2.6209e-06	0.885957	0.387	0.246	0.0766901	CXCL10_Mac
RBBP6	3.69553e-06	0.63095	0.641	0.488	0.108135	CXCL10_Mac
AL645608.7	4.47835e-06	0.765621	0.313	0.186	0.131041	CXCL10_Mac
ASCC3	4.78833e-06	0.624694	0.336	0.2	0.140111	CXCL10_Mac
GPR35	4.85412e-06	0.817029	0.309	0.182	0.142036	CXCL10_Mac
ATP13A2	7.21532e-06	0.774716	0.263	0.148	0.211128	CXCL10_Mac
NRARP	8.0892e-06	0.612937	0.369	0.236	0.236698	CXCL10_Mac
HRH2	1.12363e-05	0.687369	0.313	0.19	0.328786	CXCL10_Mac
ASCC2	1.30557e-05	0.600615	0.272	0.158	0.382024	CXCL10_Mac
TBC1D17	1.44563e-05	0.761792	0.276	0.159	0.423005	CXCL10_Mac
TXNDC9	1.59505e-05	0.758781	0.286	0.174	0.466728	CXCL10_Mac
BRCA2	2.15708e-05	0.621874	0.313	0.191	0.631182	CXCL10_Mac
STX8	2.34141e-05	0.705892	0.341	0.214	0.685119	CXCL10_Mac
AC058791.1	2.52784e-05	0.849747	0.355	0.232	0.739671	CXCL10_Mac
SIDT2	2.89627e-05	0.60332	0.35	0.229	0.847479	CXCL10_Mac
POLR3GL	2.93659e-05	0.678407	0.346	0.224	0.859274	CXCL10_Mac
DAP3	4.29133e-05	0.629861	0.396	0.266	1	CXCL10_Mac
ZFY	4.55314e-05	0.693052	0.364	0.24	1	CXCL10_Mac
NUDT16	4.63927e-05	0.766286	0.281	0.176	1	CXCL10_Mac
KCNJ2	4.64735e-05	0.821446	0.281	0.171	1	CXCL10_Mac
GART	4.70626e-05	0.71064	0.263	0.158	1	CXCL10_Mac
SLC25A33	5.95851e-05	0.659808	0.263	0.156	1	CXCL10_Mac
CD38	6.96336e-05	0.698836	0.281	0.174	1	CXCL10_Mac
ARL2	8.06919e-05	0.656815	0.332	0.216	1	CXCL10_Mac
PAXX	0.000109188	0.662889	0.263	0.16	1	CXCL10_Mac
AC090617.10	0.000118966	0.639543	0.346	0.226	1	CXCL10_Mac
NT5C3A	0.00018228	0.816438	0.382	0.274	1	CXCL10_Mac
C1orf52	0.000243629	0.718583	0.263	0.167	1	CXCL10_Mac
PANK2	0.000411783	0.735449	0.295	0.203	1	CXCL10_Mac
SH3TC1	0.000497925	0.621519	0.272	0.18	1	CXCL10_Mac
ACOD1	0.000941284	0.631206	0.286	0.195	1	CXCL10_Mac
SLC66A3	0.00101011	0.618506	0.295	0.208	1	CXCL10_Mac
LRRK2	0.00178976	0.612416	0.309	0.216	1	CXCL10_Mac
CXCL5	3.22836e-61	3.34769	0.606	0.166	9.44652e-57	INHBA_Mac
INHBA	1.47266e-60	2.24092	0.903	0.475	4.30914e-56	INHBA_Mac
TNFAIP6	8.85979e-60	2.80214	0.796	0.349	2.59246e-55	INHBA_Mac
FTH1	7.25252e-55	1.14942	0.995	0.999	2.12216e-50	INHBA_Mac
CXCL8	5.52085e-54	1.50891	0.986	0.91	1.61545e-49	INHBA_Mac
SOD2	1.58526e-53	1.01731	0.995	0.951	4.63863e-49	INHBA_Mac
AQP9	3.71911e-52	2.26728	0.662	0.235	1.08825e-47	INHBA_Mac
PLAUR	1.4262e-45	1.14664	1	0.9	4.1732e-41	INHBA_Mac
TNIP3	1.95571e-44	2.42377	0.722	0.325	5.7226e-40	INHBA_Mac
SLC7A11	1.45081e-43	2.79669	0.421	0.098	4.24521e-39	INHBA_Mac
ITGB8	1.51232e-39	3.21073	0.375	0.086	4.42519e-35	INHBA_Mac
PTGS2	1.62742e-37	1.67029	0.944	0.765	4.76198e-33	INHBA_Mac
NT5E	8.94969e-36	2.94374	0.292	0.055	2.61877e-31	INHBA_Mac
CD44	1.02845e-35	1.06664	0.963	0.837	3.00934e-31	INHBA_Mac
CCL20	4.66302e-34	1.788	0.847	0.505	1.36445e-29	INHBA_Mac
SLC11A1	9.87391e-34	1.35199	0.81	0.487	2.88921e-29	INHBA_Mac
SDC2	1.18286e-33	1.43881	0.75	0.368	3.46117e-29	INHBA_Mac
SLAMF9	3.02507e-31	3.36283	0.259	0.05	8.85164e-27	INHBA_Mac
SLC2A3	4.16711e-31	1.42929	0.875	0.649	1.21934e-26	INHBA_Mac
IL1B	1.01718e-30	0.939289	0.986	0.881	2.97638e-26	INHBA_Mac
HK2	2.2019e-30	1.99048	0.579	0.262	6.44298e-26	INHBA_Mac
C15orf48	1.58327e-29	1.08875	0.977	0.861	4.6328e-25	INHBA_Mac
CCL3	8.24233e-29	1.08472	0.972	0.847	2.41179e-24	INHBA_Mac
PLIN2	1.47495e-28	1.53275	0.806	0.531	4.31585e-24	INHBA_Mac
SERPINB2	4.55231e-28	3.6447	0.273	0.061	1.33205e-23	INHBA_Mac
EMP1	5.43721e-27	2.13332	0.435	0.155	1.59098e-22	INHBA_Mac
IL6	2.85951e-25	1.68439	0.782	0.516	8.36723e-21	INHBA_Mac
CXCL3	8.65977e-25	1.31482	0.958	0.796	2.53393e-20	INHBA_Mac
ADM	1.56248e-24	1.78307	0.648	0.353	4.57198e-20	INHBA_Mac
SLC25A37	1.52653e-23	2.20676	0.491	0.225	4.46677e-19	INHBA_Mac
NAMPT	3.3894e-23	0.789057	0.981	0.899	9.91773e-19	INHBA_Mac
SPP1	6.37476e-23	2.11737	0.574	0.277	1.86532e-18	INHBA_Mac
CSTB	1.66341e-22	0.910973	0.94	0.855	4.8673e-18	INHBA_Mac
G0S2	1.77583e-21	1.1151	0.856	0.626	5.19625e-17	INHBA_Mac
SLAMF1	2.26718e-21	2.88063	0.264	0.075	6.634e-17	INHBA_Mac
BCAT1	2.48597e-21	1.48761	0.63	0.377	7.27419e-17	INHBA_Mac
NRIP3	5.31373e-21	1.67865	0.458	0.203	1.55485e-16	INHBA_Mac
IL1RN	1.49787e-20	1.08164	0.866	0.725	4.38292e-16	INHBA_Mac
BASP1	1.79701e-20	1.15602	0.824	0.668	5.25822e-16	INHBA_Mac
TREM1	2.59544e-20	1.25471	0.593	0.31	7.59452e-16	INHBA_Mac
BNIP3L	3.93081e-19	1.3256	0.75	0.549	1.15019e-14	INHBA_Mac
MTF1	3.97491e-19	1.44149	0.509	0.253	1.1631e-14	INHBA_Mac
ERO1A	1.02662e-18	1.39685	0.62	0.401	3.00401e-14	INHBA_Mac
UPP1	3.02245e-18	1.07596	0.759	0.541	8.844e-14	INHBA_Mac
MSANTD3	4.78007e-18	1.74727	0.343	0.134	1.3987e-13	INHBA_Mac
VCAN	6.03331e-18	1.78418	0.407	0.174	1.76541e-13	INHBA_Mac
FNIP2	6.77361e-18	0.817943	0.861	0.66	1.98203e-13	INHBA_Mac
DUSP4	1.10249e-17	1.01359	0.69	0.434	3.22599e-13	INHBA_Mac
SLC41A2	1.19185e-17	1.81119	0.356	0.142	3.48746e-13	INHBA_Mac
LUCAT1	1.32309e-17	1.00671	0.847	0.628	3.87151e-13	INHBA_Mac
ARID5B	1.5306e-17	1.16308	0.713	0.48	4.4787e-13	INHBA_Mac
IL3RA	2.77462e-17	1.43369	0.519	0.281	8.11881e-13	INHBA_Mac
CCL3L1	2.95004e-17	1.24593	0.912	0.722	8.63211e-13	INHBA_Mac
SNX10	1.00145e-16	1.39197	0.782	0.623	2.93034e-12	INHBA_Mac
CD300E	1.01393e-16	1.26564	0.662	0.439	2.96685e-12	INHBA_Mac
CTSL	1.6503e-16	0.941191	0.944	0.817	4.82895e-12	INHBA_Mac
TNIP1	1.78535e-16	1.21428	0.657	0.439	5.2241e-12	INHBA_Mac
ETS2	2.10088e-16	0.716571	0.907	0.737	6.14738e-12	INHBA_Mac
NBN	2.60204e-16	1.3799	0.62	0.404	7.61381e-12	INHBA_Mac
DNAAF1	3.50898e-16	1.37747	0.398	0.174	1.02676e-11	INHBA_Mac
EREG	5.35796e-16	0.937688	0.787	0.504	1.56779e-11	INHBA_Mac
IL1A	7.68726e-16	1.34074	0.722	0.499	2.24937e-11	INHBA_Mac
LRP12	1.18939e-15	1.71996	0.417	0.207	3.48027e-11	INHBA_Mac
SAT1	1.20045e-15	0.684053	0.995	0.97	3.51263e-11	INHBA_Mac
ANKRD28	1.27334e-15	1.37133	0.556	0.329	3.72591e-11	INHBA_Mac
IVNS1ABP	1.77e-15	0.970826	0.824	0.65	5.17921e-11	INHBA_Mac
CXCL2	2.86787e-15	0.906861	0.94	0.831	8.39168e-11	INHBA_Mac
CXCL1	2.90767e-15	1.22364	0.801	0.618	8.50814e-11	INHBA_Mac
ATP13A3	3.45223e-15	0.664374	0.894	0.734	1.01016e-10	INHBA_Mac
AMPD3	3.79311e-15	1.4672	0.472	0.255	1.1099e-10	INHBA_Mac
TIMP1	5.94288e-15	1.62544	0.833	0.724	1.73895e-10	INHBA_Mac
PID1	7.4977e-15	2.13541	0.264	0.096	2.1939e-10	INHBA_Mac
TNFRSF1B	1.3868e-14	0.915126	0.852	0.738	4.05791e-10	INHBA_Mac
ABL2	3.14377e-14	0.719024	0.903	0.751	9.19899e-10	INHBA_Mac
RAC2	4.20573e-14	0.96721	0.662	0.463	1.23064e-09	INHBA_Mac
NDRG1	1.26761e-13	0.842426	0.704	0.504	3.70916e-09	INHBA_Mac
ADORA2A	1.90844e-13	1.74546	0.296	0.122	5.58427e-09	INHBA_Mac
BNIP3	1.93031e-13	1.39945	0.403	0.204	5.64829e-09	INHBA_Mac
EHD1	3.95902e-13	0.948955	0.671	0.477	1.15845e-08	INHBA_Mac
BZW1	5.68452e-13	0.703862	0.838	0.701	1.66335e-08	INHBA_Mac
FLT1	1.07801e-12	2.095	0.301	0.129	3.15437e-08	INHBA_Mac
GK	1.18663e-12	0.878795	0.796	0.65	3.47221e-08	INHBA_Mac
CSNK1E	1.71774e-12	1.59015	0.338	0.162	5.02629e-08	INHBA_Mac
MMP1	2.0223e-12	3.66386	0.287	0.126	5.91744e-08	INHBA_Mac
C1orf122	2.16505e-12	1.36871	0.477	0.299	6.33516e-08	INHBA_Mac
ASAP1	2.39777e-12	1.00583	0.63	0.481	7.01612e-08	INHBA_Mac
SLC16A10	3.01034e-12	0.742218	0.773	0.556	8.80854e-08	INHBA_Mac
PFKFB3	5.9929e-12	0.84666	0.694	0.53	1.75358e-07	INHBA_Mac
OSBPL8	6.15644e-12	0.89056	0.718	0.54	1.80144e-07	INHBA_Mac
CLEC4E	8.13839e-12	1.12939	0.574	0.377	2.38137e-07	INHBA_Mac
RCAN1	1.25874e-11	0.692225	0.583	0.368	3.68319e-07	INHBA_Mac
IRAK3	1.45604e-11	1.11301	0.565	0.377	4.26052e-07	INHBA_Mac
FLNA	1.73944e-11	0.684557	0.806	0.676	5.08978e-07	INHBA_Mac
MT1F	2.07799e-11	1.65116	0.319	0.152	6.08041e-07	INHBA_Mac
IRS2	2.30149e-11	1.01632	0.556	0.373	6.7344e-07	INHBA_Mac
CCL4	2.68353e-11	0.733362	0.921	0.826	7.85227e-07	INHBA_Mac
TRGC1	2.78851e-11	1.92019	0.25	0.104	8.15946e-07	INHBA_Mac
RYBP	2.91999e-11	1.02191	0.588	0.409	8.54419e-07	INHBA_Mac
AC015912.3	3.2057e-11	1.61962	0.389	0.209	9.38021e-07	INHBA_Mac
MT2A	3.74354e-11	2.18684	0.792	0.709	1.0954e-06	INHBA_Mac
ZFYVE16	3.99879e-11	0.675385	0.847	0.68	1.17009e-06	INHBA_Mac
IL23A	5.12678e-11	1.45743	0.398	0.208	1.50015e-06	INHBA_Mac
DDX60L	5.60823e-11	1.0332	0.588	0.405	1.64102e-06	INHBA_Mac
MT1E	6.44793e-11	2.04012	0.375	0.209	1.88673e-06	INHBA_Mac
CSGALNACT2	7.62375e-11	0.889658	0.625	0.469	2.23079e-06	INHBA_Mac
PPP4R2	8.45913e-11	0.968889	0.583	0.404	2.47523e-06	INHBA_Mac
GPAT4	1.38819e-10	1.27202	0.398	0.228	4.06199e-06	INHBA_Mac
RAB13	1.5365e-10	0.960067	0.514	0.348	4.49594e-06	INHBA_Mac
NR3C1	1.60192e-10	0.849219	0.565	0.402	4.68738e-06	INHBA_Mac
MAP3K20	1.64145e-10	1.92378	0.306	0.151	4.80306e-06	INHBA_Mac
TSC22D1	1.72555e-10	1.16421	0.532	0.349	5.04913e-06	INHBA_Mac
ANPEP	1.85643e-10	0.897294	0.583	0.4	5.43211e-06	INHBA_Mac
PDE4DIP	1.89314e-10	0.677733	0.741	0.578	5.53952e-06	INHBA_Mac
FNDC3B	2.00184e-10	0.697735	0.778	0.643	5.85759e-06	INHBA_Mac
CHST2	2.06774e-10	1.23933	0.398	0.221	6.05041e-06	INHBA_Mac
QSOX1	2.14943e-10	0.913199	0.611	0.465	6.28944e-06	INHBA_Mac
OGFRL1	2.57634e-10	0.80255	0.736	0.605	7.53861e-06	INHBA_Mac
PDLIM7	2.90845e-10	1.08738	0.403	0.224	8.51041e-06	INHBA_Mac
SMOX	3.0634e-10	1.42221	0.37	0.203	8.96382e-06	INHBA_Mac
P4HA1	7.41594e-10	0.934857	0.542	0.377	2.16998e-05	INHBA_Mac
TNIK	7.86999e-10	1.6138	0.255	0.117	2.30284e-05	INHBA_Mac
TCEAL9	8.56573e-10	0.905406	0.454	0.277	2.50642e-05	INHBA_Mac
SLC5A3	8.89216e-10	0.9569	0.648	0.464	2.60194e-05	INHBA_Mac
RUNX1	9.02249e-10	0.683665	0.694	0.535	2.64007e-05	INHBA_Mac
CD82	9.83067e-10	1.40739	0.394	0.227	2.87655e-05	INHBA_Mac
LPCAT1	1.22547e-09	1.09367	0.56	0.414	3.58584e-05	INHBA_Mac
MPZL1	1.29964e-09	1.23727	0.394	0.235	3.80289e-05	INHBA_Mac
ACSL4	1.46005e-09	0.979227	0.639	0.492	4.27226e-05	INHBA_Mac
SLC2A1	1.73968e-09	1.30629	0.259	0.119	5.09047e-05	INHBA_Mac
DYRK3	1.76171e-09	1.65001	0.282	0.138	5.15494e-05	INHBA_Mac
PALM2-AKAP2	1.97913e-09	1.15716	0.486	0.33	5.79114e-05	INHBA_Mac
UBE2J1	2.71627e-09	0.864123	0.606	0.45	7.94806e-05	INHBA_Mac
LILRA1	2.90864e-09	1.60254	0.319	0.173	8.51098e-05	INHBA_Mac
SSBP3	3.01992e-09	1.44419	0.301	0.157	8.83659e-05	INHBA_Mac
KDM7A-DT	3.18976e-09	1.23834	0.394	0.232	9.33355e-05	INHBA_Mac
SH3BP5	3.24571e-09	0.76962	0.653	0.523	9.49728e-05	INHBA_Mac
INSIG2	3.44746e-09	1.49749	0.292	0.149	0.000100876	INHBA_Mac
VEGFA	3.71358e-09	0.847687	0.806	0.643	0.000108663	INHBA_Mac
PIK3AP1	4.04406e-09	0.695672	0.731	0.612	0.000118333	INHBA_Mac
RABGEF1	4.74784e-09	0.866533	0.495	0.329	0.000138927	INHBA_Mac
LSS	1.07129e-08	1.43113	0.319	0.179	0.00031347	INHBA_Mac
KCNN4	1.16107e-08	1.2178	0.31	0.162	0.000339739	INHBA_Mac
IRAK2	1.64704e-08	1.07807	0.491	0.32	0.00048194	INHBA_Mac
ZNF281	2.19006e-08	1.08414	0.394	0.241	0.000640833	INHBA_Mac
PTPN12	2.42272e-08	0.690259	0.704	0.567	0.000708912	INHBA_Mac
METTL9	2.54042e-08	1.13759	0.407	0.264	0.000743353	INHBA_Mac
CPD	4.22624e-08	1.47457	0.375	0.234	0.00123664	INHBA_Mac
ABI1	4.65211e-08	0.606738	0.63	0.497	0.00136125	INHBA_Mac
ELL2	5.65176e-08	0.601397	0.713	0.579	0.00165376	INHBA_Mac
SPATA13	6.86646e-08	1.13558	0.361	0.218	0.00200919	INHBA_Mac
AC025580.2	7.04639e-08	1.43632	0.264	0.136	0.00206185	INHBA_Mac
HCAR2	7.84735e-08	1.31068	0.315	0.177	0.00229621	INHBA_Mac
RAPGEF2	9.12561e-08	0.606326	0.708	0.559	0.00267025	INHBA_Mac
CCDC93	1.34369e-07	1.43002	0.333	0.203	0.00393176	INHBA_Mac
RGCC	1.46917e-07	0.921162	0.556	0.394	0.00429894	INHBA_Mac
SIK3	1.47763e-07	0.977341	0.449	0.298	0.0043237	INHBA_Mac
CERT1	1.71216e-07	0.847377	0.491	0.338	0.00500996	INHBA_Mac
ERGIC1	2.02654e-07	1.07521	0.486	0.352	0.00592985	INHBA_Mac
H1F0	2.12603e-07	1.25221	0.389	0.252	0.00622097	INHBA_Mac
SNAPC1	2.32609e-07	1.20436	0.338	0.203	0.00680637	INHBA_Mac
CYTH1	2.7995e-07	0.690069	0.676	0.559	0.00819161	INHBA_Mac
SDC4	2.83935e-07	0.99395	0.486	0.348	0.00830821	INHBA_Mac
ST3GAL1	3.08023e-07	0.817226	0.556	0.407	0.00901307	INHBA_Mac
MAP2K1	3.13979e-07	0.771239	0.556	0.421	0.00918733	INHBA_Mac
KYNU	3.20966e-07	0.656655	0.782	0.688	0.00939179	INHBA_Mac
CLEC5A	3.5996e-07	0.71716	0.583	0.426	0.0105328	INHBA_Mac
MAP3K4	3.7581e-07	1.78172	0.269	0.151	0.0109966	INHBA_Mac
OLR1	3.9212e-07	1.02143	0.551	0.423	0.0114738	INHBA_Mac
ATP2B1-AS1	4.78972e-07	0.948114	0.532	0.383	0.0140152	INHBA_Mac
MT1G	5.86752e-07	2.10901	0.273	0.152	0.017169	INHBA_Mac
AL133453.1	6.29561e-07	1.19531	0.25	0.132	0.0184216	INHBA_Mac
DRAM1	8.23631e-07	0.778621	0.602	0.483	0.0241003	INHBA_Mac
TNF	9.16128e-07	0.721027	0.769	0.654	0.0268068	INHBA_Mac
DUSP5	1.02595e-06	0.817662	0.523	0.388	0.0300202	INHBA_Mac
SOAT1	1.04013e-06	0.82851	0.514	0.395	0.0304352	INHBA_Mac
EIF1B	1.26319e-06	1.1533	0.556	0.45	0.0369623	INHBA_Mac
SEC62	1.71286e-06	0.7223	0.653	0.561	0.05012	INHBA_Mac
PHLDA1	1.94122e-06	0.648755	0.671	0.544	0.056802	INHBA_Mac
HS3ST3B1	2.05138e-06	0.877985	0.403	0.273	0.0600256	INHBA_Mac
DENND5A	2.48556e-06	0.792358	0.481	0.348	0.0727301	INHBA_Mac
MIR3945HG	2.82314e-06	1.18606	0.361	0.239	0.082608	INHBA_Mac
FOXO3	3.13996e-06	0.691942	0.532	0.409	0.0918785	INHBA_Mac
TSPAN3	3.1825e-06	0.863445	0.375	0.248	0.0931232	INHBA_Mac
GRAMD1A	3.39872e-06	1.10544	0.417	0.305	0.09945	INHBA_Mac
ITGA5	3.42193e-06	0.749052	0.486	0.358	0.100129	INHBA_Mac
SLC2A6	3.48995e-06	1.25096	0.296	0.182	0.102119	INHBA_Mac
LRIF1	4.36791e-06	1.24889	0.329	0.209	0.127809	INHBA_Mac
IL2RA	4.90042e-06	0.957429	0.278	0.164	0.143391	INHBA_Mac
CPM	5.15609e-06	0.913985	0.491	0.391	0.150872	INHBA_Mac
NIBAN2	6.23063e-06	0.782254	0.454	0.329	0.182314	INHBA_Mac
RNF144B	6.46161e-06	0.657906	0.542	0.405	0.189073	INHBA_Mac
SMS	8.6936e-06	0.660723	0.505	0.391	0.254384	INHBA_Mac
TOM1	8.84294e-06	0.819583	0.435	0.31	0.258753	INHBA_Mac
NOTCH2	9.23945e-06	0.974768	0.315	0.196	0.270356	INHBA_Mac
SEC24A	9.5643e-06	0.79462	0.398	0.276	0.279861	INHBA_Mac
ERBIN	1.0368e-05	0.628433	0.634	0.535	0.303377	INHBA_Mac
EAF1	1.07817e-05	1.03226	0.366	0.249	0.315484	INHBA_Mac
TLR2	1.09077e-05	0.73752	0.616	0.504	0.31917	INHBA_Mac
LAMB3	1.15298e-05	1.39856	0.273	0.169	0.337373	INHBA_Mac
MAP3K5	1.43658e-05	1.07416	0.394	0.279	0.420357	INHBA_Mac
SLC11A2	1.45711e-05	0.811812	0.542	0.442	0.426364	INHBA_Mac
ERRFI1	1.49841e-05	0.950403	0.389	0.268	0.438449	INHBA_Mac
GGT5	1.5086e-05	1.05696	0.333	0.217	0.441432	INHBA_Mac
DOCK4	1.53762e-05	0.60697	0.639	0.551	0.449922	INHBA_Mac
KIF1B	1.72127e-05	0.605716	0.634	0.543	0.503661	INHBA_Mac
PCNX1	1.89282e-05	0.635376	0.505	0.387	0.553859	INHBA_Mac
PIK3CB	1.927e-05	1.17903	0.273	0.167	0.56386	INHBA_Mac
PAG1	2.00751e-05	0.71815	0.528	0.409	0.587417	INHBA_Mac
AGTRAP	2.45116e-05	0.765481	0.398	0.285	0.717234	INHBA_Mac
LPP	2.60389e-05	0.729028	0.546	0.44	0.761925	INHBA_Mac
MT1X	2.67459e-05	1.23323	0.491	0.381	0.782613	INHBA_Mac
BEX3	3.37638e-05	0.790958	0.287	0.179	0.987962	INHBA_Mac
PRKCH	4.91643e-05	0.920572	0.264	0.162	1	INHBA_Mac
FNDC3A	7.40557e-05	0.7122	0.505	0.403	1	INHBA_Mac
MRPS6	9.31564e-05	0.676445	0.514	0.418	1	INHBA_Mac
HCAR3	9.84385e-05	0.981824	0.273	0.174	1	INHBA_Mac
ACSL1	0.000105697	0.816755	0.551	0.452	1	INHBA_Mac
BTG3	0.000105777	0.82129	0.444	0.352	1	INHBA_Mac
ANTXR2	0.000135257	0.658859	0.398	0.289	1	INHBA_Mac
SERTAD1	0.000139224	0.638749	0.477	0.387	1	INHBA_Mac
POR	0.000139771	0.928357	0.319	0.217	1	INHBA_Mac
IRAK1	0.000153179	0.653219	0.431	0.334	1	INHBA_Mac
ITPRIP	0.000156531	0.631915	0.38	0.273	1	INHBA_Mac
SLC39A8	0.00016441	1.23031	0.389	0.302	1	INHBA_Mac
HEXIM1	0.000165246	0.800678	0.472	0.37	1	INHBA_Mac
XIAP	0.000177053	0.684991	0.44	0.336	1	INHBA_Mac
DDIT3	0.000185893	0.716101	0.338	0.234	1	INHBA_Mac
PDPN	0.000186442	0.723226	0.347	0.24	1	INHBA_Mac
GPR84	0.000191255	0.821684	0.458	0.359	1	INHBA_Mac
HIPK2	0.000197382	0.917417	0.329	0.231	1	INHBA_Mac
SLC1A3	0.000203812	1.10924	0.264	0.176	1	INHBA_Mac
CD274	0.000214466	0.917335	0.398	0.312	1	INHBA_Mac
RB1CC1	0.000244473	0.859727	0.444	0.361	1	INHBA_Mac
CHM	0.000297094	0.866146	0.296	0.203	1	INHBA_Mac
IL1R1	0.000313582	0.987112	0.329	0.237	1	INHBA_Mac
STRN3	0.000332897	0.901597	0.273	0.186	1	INHBA_Mac
MAP4K4	0.000334493	0.623819	0.505	0.405	1	INHBA_Mac
ZNF292	0.000381841	0.632737	0.421	0.32	1	INHBA_Mac
MECP2	0.000423305	0.660996	0.389	0.303	1	INHBA_Mac
KMO	0.000425808	0.703825	0.491	0.398	1	INHBA_Mac
MTHFS	0.000564608	1.0527	0.282	0.202	1	INHBA_Mac
SLC44A1	0.00057076	0.760779	0.468	0.377	1	INHBA_Mac
CARD19	0.000602403	0.823817	0.356	0.267	1	INHBA_Mac
P2RX4	0.000722438	0.765701	0.444	0.37	1	INHBA_Mac
SERTAD2	0.000740389	0.690635	0.264	0.178	1	INHBA_Mac
AC007384.1	0.000767094	0.754598	0.347	0.261	1	INHBA_Mac
TNS3	0.000837254	0.60913	0.468	0.382	1	INHBA_Mac
CCL4L2	0.000895777	0.878572	0.741	0.702	1	INHBA_Mac
SEPHS2	0.000934483	0.836093	0.394	0.309	1	INHBA_Mac
BANP	0.000952623	0.726119	0.343	0.254	1	INHBA_Mac
MMP24OS	0.000953414	0.65518	0.338	0.246	1	INHBA_Mac
VDR	0.000960599	0.603305	0.352	0.259	1	INHBA_Mac
APH1B	0.00101885	0.713214	0.319	0.239	1	INHBA_Mac
CA2	0.00103257	0.818582	0.25	0.169	1	INHBA_Mac
STAT4	0.00117664	0.677235	0.366	0.284	1	INHBA_Mac
UGCG	0.00120052	0.819741	0.417	0.338	1	INHBA_Mac
ZBTB38	0.00120239	0.843812	0.426	0.359	1	INHBA_Mac
HIVEP2	0.00170295	0.615131	0.338	0.257	1	INHBA_Mac
MITF	0.0017052	0.95453	0.319	0.239	1	INHBA_Mac
NRBP1	0.001828	0.619698	0.389	0.315	1	INHBA_Mac
TP53BP2	0.00184246	0.744499	0.356	0.279	1	INHBA_Mac
STRN	0.00204283	0.770192	0.259	0.183	1	INHBA_Mac
ZFX	0.00207657	0.941714	0.343	0.274	1	INHBA_Mac
IL10	0.00226684	0.640306	0.477	0.385	1	INHBA_Mac
SLC6A6	0.00229319	0.611603	0.431	0.362	1	INHBA_Mac
VHL	0.00291498	0.879257	0.259	0.189	1	INHBA_Mac
HERC4	0.00302207	0.851402	0.319	0.252	1	INHBA_Mac
PIM1	0.00319921	0.638877	0.398	0.33	1	INHBA_Mac
SMIM3	0.0033638	0.718573	0.338	0.263	1	INHBA_Mac
STX3	0.00339046	0.64126	0.333	0.262	1	INHBA_Mac
F3	0.00351174	0.934878	0.278	0.199	1	INHBA_Mac
ACOD1	0.00352698	0.804172	0.278	0.196	1	INHBA_Mac
TMEM41B	0.00378638	0.833377	0.264	0.193	1	INHBA_Mac
KLHL24	0.00430688	0.687309	0.259	0.189	1	INHBA_Mac
PAPSS2	0.00443729	0.736453	0.37	0.291	1	INHBA_Mac
RBM23	0.00451292	0.61872	0.361	0.291	1	INHBA_Mac
CCL5	0.00571522	1.23011	0.333	0.263	1	INHBA_Mac
RHOU	0.00588931	0.833985	0.319	0.251	1	INHBA_Mac
SCARF1	0.00594303	0.674206	0.324	0.254	1	INHBA_Mac
KDM5B	0.00595441	0.644834	0.264	0.193	1	INHBA_Mac
NBPF19	0.0076109	0.642668	0.264	0.194	1	INHBA_Mac
DEDD2	0.00778601	0.814537	0.329	0.265	1	INHBA_Mac
RHBDD2	0.00820199	0.67655	0.269	0.202	1	INHBA_Mac
KLHL21	0.00869026	0.890756	0.273	0.213	1	INHBA_Mac
RELA	0.00878002	0.685794	0.31	0.246	1	INHBA_Mac
DUSP16	0.00924125	0.650719	0.259	0.194	1	INHBA_Mac
