# Supplementary material for: INHBA+ Macrophages and Pro-inflammatory CAFs are Associated with Distinctive Immunosuppressive Tumor Microenvironment in Submucous Fibrosis-Derived Oral Squamous Cell Carcinoma
Source: Research Square preprint supplement (doi:10.21203/rs.3.rs-6079144/v1), 2025-04-15
Supplement: Supplementary file 4 [file d3c7c187659ed4343bc0f3d4.xlsx]

## Sheet: T cell
Dysfunctional signatures of Tterm	Immunesuppression related TFs of T cells	Co-inhibitory molecules of Treg
PDCD1	BATF	CTLA4
PHLDA1	BCL6	PDCD1
TIGIT	HOPX	CD47
TNFRSF9	NR4A3	IL2RG
HAVCR2	BHLHE40	IL2RB
LAG3	ID2	TIGIT
CD7	PRDM1	CD96
PTMS	BTLA	IL2RA
FAM3C	ID3	LAYN
IFNG	RBPJ	ENTPD1
AKAP5	CD200	LAG3
CTLA4	IFI16	VSIR
CD27	SOX4	HAVCR2
ITGAE	EOMES	BTLA
CCL3	IKZF3	CD274
PAG1	STAT3	EBI3
TNFRSF1B	ETV1
GALNT1	NR4A1
GBP2	TBX21
MYO7A	FOXP3
CSF1	NR4A2
RAB27A	TCF7
MIR155HG	TOX
LYST	TOX2
KIR2DL4	VDR
RDH10	ZNF683
CXCL13	ZBED2
TNS3	IFI16
SNAP47	DRAP1
ENTPD1	ETS1

## Sheet: Macrophages
Co-stimulatory Molecules	Immune Checkpoints	MHC factors
CD226	ADORA2A	B2M
CD27	CD160	HLA-A
CD40	CD200	HLA-B
CD40LG	CD244	HLA-C
CD44	CD274	HLA-DPA1
CD70	CECAM1	HLA-DRA
CD48	CTLA4	HLA-DRB1
CD80	FGL1	HLA-E
CD86 。	HAVCR2	HLA-F
ICOS	HHLA2	TAP1
ICOSLG	KIR3DL1	TAPBP
TNFRSF4	LAG3
TNFRSF8	LAIR1
TNFRSF9	LGALS9
TNFRSF25	NECTIN2
TNFSF4	NRP1
TNFSF8	PDCD1
TNFSF9	PDCD1LG2
	PVR
	TIGIT
	VTCN1
