# Supplementary material for: INHBA+ Macrophages and Pro-inflammatory CAFs are Associated with Distinctive Immunosuppressive Tumor Microenvironment in Submucous Fibrosis-Derived Oral Squamous Cell Carcinoma
Source: Research Square preprint supplement (doi:10.21203/rs.3.rs-6079144/v1), 2025-04-15
Supplement: Supplementary file 5 [file d51a4e27af8864b9bf7aeff0.xlsx]

## Sheet: dfnet$count1withoutOSF
communication strength(total)
income\outgo	B cell	Endothelial cell	Epithelial cell	Fibroblast cell	Mast cell	Myeloid cell	Plasma cell	T cell
B cell	0.193264	0.0537315	0	0.0246135	0.0288744	0.52596	0.177708	0.164274
Endothelial cell	0.665075	0.996577	0.224941	0.736698	0.669409	1.05999	0.435202	0.61253
Epithelial cell	0.358606	0.0479734	0.00381471	0.0136421	0.118107	0.354314	0.228937	0.255743
Fibroblast cell	1.19931	1.86026	0.732144	2.04401	1.7181	1.97804	0.839417	1.36062
Mast cell	0.267737	0.211228	0.0116859	0.124489	0.123803	0.359961	0.121746	0.212387
Myeloid cell	0.223172	0.494817	0.00852512	0.127282	0.100553	0.851605	0.259468	0.249755
Plasma cell	0.229775	0.0865232	0.00141159	0.0329613	0.0193786	0.325946	0.122102	0.135552
T cell	0.211806	0.0901526	0	0.0440223	0.029372	0.247109	0.0743958	0.151849
communication count(total)
income\outgo	B cell	Endothelial cell	Epithelial cell	Fibroblast cell	Mast cell	Myeloid cell	Plasma cell	T cell
B cell	5	7	0	6	4	18	12	9
Endothelial cell	22	84	42	60	25	60	46	26
Epithelial cell	4	11	4	6	3	8	6	8
Fibroblast cell	28	85	53	62	29	68	49	30
Mast cell	9	18	4	14	10	28	15	13
Myeloid cell	12	29	3	19	10	36	24	16
Plasma cell	6	14	1	10	5	23	15	9
T cell	5	9	0	8	3	17	6	8
communication count
NODSCC
income\outgo	B cell	Endothelial cell	Epithelial cell	Fibroblast cell	Mast cell	Myeloid cell	Plasma cell	T cell
B cell	4	7	0	5	4	18	14	3
Endothelial cell	22	103	62	75	24	60	38	21
Epithelial cell	6	41	19	23	7	14	11	7
Fibroblast cell	26	100	73	75	26	63	35	23
Mast cell	11	25	15	19	10	32	16	10
Myeloid cell	12	29	8	17	10	37	25	11
Plasma cell	9	15	3	10	8	27	18	7
T cell	5	9	2	8	3	16	7	3
ODSCC
income\outgo	B cell	Endothelial cell	Epithelial cell	Fibroblast cell	Mast cell	Myeloid cell	Plasma cell	T cell
B cell	3	5	0	5	3	16	2	9
Endothelial cell	20	83	1	69	25	60	37	28
Epithelial cell	2	1	0	1	1	3	2	6
Fibroblast cell	27	87	2	77	31	70	46	32
Mast cell	8	20	0	19	11	29	10	14
Myeloid cell	10	32	0	23	11	42	15	19
Plasma cell	3	11	0	10	4	20	6	9
T cell	3	12	0	10	3	20	2	9
communication strength
NODSCC
income\outgo	B cell	Endothelial cell	Epithelial cell	Fibroblast cell	Mast cell	Myeloid cell	Plasma cell	T cell
B cell	0.134301	0.0523349	0	0.0234717	0.0284211	0.481862	0.215148	0.0287561
Endothelial cell	0.660027	1.01879	0.349257	0.78982	0.558423	1.00547	0.441676	0.493602
Epithelial cell	0.385663	0.153694	0.0386079	0.0823793	0.158608	0.374239	0.27067	0.23268
Fibroblast cell	1.22444	2.05147	1.16771	2.34229	1.6713	1.94	0.782785	1.26853
Mast cell	0.273492	0.201415	0.0215734	0.129991	0.0586125	0.344419	0.141321	0.116172
Myeloid cell	0.231467	0.486583	0.0209526	0.129924	0.101077	0.820821	0.302455	0.162195
Plasma cell	0.259549	0.103694	0.00399733	0.0508971	0.0401811	0.385373	0.175186	0.0911032
T cell	0.210893	0.0857485	0.00160428	0.0424617	0.0272578	0.181998	0.0893154	0.0560129
ODSCC
income\outgo	B cell	Endothelial cell	Epithelial cell	Fibroblast cell	Mast cell	Myeloid cell	Plasma cell	T cell
B cell	0.104025	0.0507073	0	0.0188936	0.0307064	0.599547	0.0589918	0.236731
Endothelial cell	0.547402	1.3764	0.00729979	1.01522	0.940712	1.30209	0.542994	0.876976
Epithelial cell	0.306825	0.0218087	0	0.00556707	0.133217	0.39736	0.221068	0.293331
Fibroblast cell	0.740643	2.31618	0.00860697	2.40905	2.00433	2.1927	0.942821	1.4959
Mast cell	0.254698	0.397128	0	0.187229	0.190751	0.494282	0.176255	0.36891
Myeloid cell	0.179246	0.552665	0	0.129792	0.117785	0.955405	0.111459	0.384004
Plasma cell	0.115649	0.0685569	0	0.0226053	0.0150924	0.303482	0.117581	0.223854
T cell	0.111571	0.158967	0	0.072901	0.0436382	0.332624	0.0635498	0.26155
