# Supplementary material for: INHBA+ Macrophages and Pro-inflammatory CAFs are Associated with Distinctive Immunosuppressive Tumor Microenvironment in Submucous Fibrosis-Derived Oral Squamous Cell Carcinoma
Source: Research Square preprint supplement (doi:10.21203/rs.3.rs-6079144/v1), 2025-04-15
Supplement: Supplementary file 6 [file e27c4048ba29864cbeb7e28a.docx]

**Method Details**

**1 Data collection**

Publicly available scRNA-seq dataset of GSE215403 was obtained from Kurkalang et al, 2023 [1] and ST dataset of GSE220978 was obtained from Zhi et al, 2024 [2], GSE208253 was obtained from Arora et al, 2023 [3].

**2** **scRNA-seq data preprocessing and Integration**

For single-cell RNA sequencing (scRNA-seq) analysis, raw count matrices were processed using the Seurat package (v4.1.0) in R. To address potential batch effects across samples in the GSE215403 dataset, we implemented the following integrative pipeline:

Batch Effect Mitigation: Merged samples were harmonized using the Harmony algorithm (v1.2.0) to correct for technical variability arising from sequencing batches or donor-specific effects. Batch-corrected embeddings were visualized via TSNE.

Rigorous Quality Control: Removed cells with <400 or >7,500 detected genes, >10% mitochondrial reads. Cells expressing hemoglobin genes (e.g., HBB, HBA1/2, HBD) were filtered using a threshold of >3 log-normalized count. Gene Filtering: Genes detected in <3 cells were excluded.

Normalization and Feature Selection: Post-filtering, data were log-normalized (scale factor = 10,000), and 3,000 highly variable genes (HVGs) were selected using the variance-stabilizing transformation (vst) method. Scaling regressed out mitochondrial read percentages and UMI count effects.

**3 Cell–cell communication analysis**

The “createCellChat” function was used to generate the cell chat object, followed by data preprocessing with the “identifyOverExpressedGenes”, “identifyOverExpressedInteractions”, and “projectData” functions using default parameters and the human CellChatDB. The “computeCommunProb”, “filterCommunication” (min.cells = 3), and “computeCommunProbPathway” functions were subsequently employed to identify potential ligand-receptor interactions. Finally, the cell communication network was aggregated using the aggregateNet function.

**4 Functional enrichment analysis**

Enrichment pathways among different subpopulations were detected by using the limma R package with |log2 fold change (FC)|>1 and adjusted p < 0.05 as the cutoff threshold [4]. A permutation approach was used to estimate an empirical FDR at a specified p-value threshold, and report multiple hypothesis correction based on the Benjamini-Hochberg (B.H.) approach to obtain corrected p-values. The 'pheatmap' and 'ggplot2' R packages were used to visualize the GSVA results. GSEA results were visualized using the ridgeplot function from the enrichplot package.

**5 Survival analysis in TCGA HNSC data set**

For INHBA+Mac survival analysis, the high- versus low-score cohorts were stratified based on median expression levels. Overall survival (OS) outcomes were evaluated through the survival R package, employing Kaplan-Meier methodology with statistical significance determined by the log-rank test. The survival:: coxph function implemented a Cox proportional hazards regression model to calculate hazard ratios (HR) with corresponding 95% confidence intervals (CI). Survival curves were generated using the survminer package’s ggsurvplot function, which interfaces with the survival package’s survfit() function for Kaplan-Meier estimation.

**6 ST data preprocessing, Integration and data visualization**

Using the “Load10×_Spatial” function to load spatial transcriptomics data, we performed normalization using the “SCTransform” function. Subsequently, the “FindIntegrationAnchors” function was applied to integrate the expression profiles and remove batch effects. The “IntegrateData” function was then utilized to merge data from eight slices.

**7 The sequences of the primers (5’-3’)**

Homo-TGFβ1-118F GCAACAATTCCTGGCGATACC;

Homo-TGFβ1-118R ATTTCCCCTCCACGGCTCAA;

H-GAPDH-138F, GCACCGTCAAGGCTGAGAAC;

H-GAPDH-138R, TGGTGAAGACGCCAGTGGA;

H-INHBA-F, CCTCCCAAAGGATGTACCCAA;

H-INHBA-R, CTCTATCTCCACATACCCGTTCT.

**8 Clinical Tissue Sample Collection**

**Selection Criteria:**

(1) Age: Patients aged 18–72 years;

(2) Diagnosis: Patients with histopathologically confirmed OSCC, subclassified as either: ODSCC, which arose from OSF with documented clinical progression (e.g., trismus, fibrotic bands); or NODSCC, which had no prior OSF diagnosis or fibrotic features;

(3) Treatment Indication: Eligibility for curative-intent surgical resection with tumor-free margins;

(4) Ethical Compliance: Written informed consent obtained prior to tissue collection.

**Exclusion Criteria:**

(1) Comorbidities: Significant systemic comorbidities (e.g., uncontrolled diabetes, cardiovascular disease) that could confound molecular analyses;

(2) Treatment History: Prior exposure to preoperative chemotherapy or radiotherapy;

(3) Neoplastic History: Concurrent or prior malignancies.

**References**

[1] S. Kurkalang, S. Roy, A. Acharya, P. Mazumder, S. Mazumder, S. Patra, S. Ghosh, S. Sarkar, S. Kundu, N.K. Biswas, S. Ghose, P.P. Majumder, A. Maitra, Single-cell transcriptomic analysis of gingivo-buccal oral cancer reveals two dominant cellular programs, Cancer Sci. 114 (2023) 4732–4746. https://doi.org/10.1111/cas.15979.

[2] Y. Zhi, Q. Wang, M. Zi, S. Zhang, J. Ge, K. Liu, L. Lu, C. Fan, Q. Yan, L. Shi, P. Chen, S. Fan, Q. Liao, C. Guo, F. Wang, Z. Gong, W. Xiong, Z. Zeng, Spatial Transcriptomic and Metabolomic Landscapes of Oral Submucous Fibrosis-Derived Oral Squamous Cell Carcinoma and its Tumor Microenvironment, Adv. Sci. Weinh. Baden-Wurtt. Ger. 11 (2024) e2306515. https://doi.org/10.1002/advs.202306515.

[3] R. Arora, C. Cao, M. Kumar, S. Sinha, A. Chanda, R. McNeil, D. Samuel, R.K. Arora, T.W. Matthews, S. Chandarana, R. Hart, J.C. Dort, J. Biernaskie, P. Neri, M.D. Hyrcza, P. Bose, Spatial transcriptomics reveals distinct and conserved tumor core and edge architectures that predict survival and targeted therapy response, Nat. Commun. 14 (2023) 5029. https://doi.org/10.1038/s41467-023-40271-4.

[4] M.E. Ritchie, B. Phipson, D. Wu, Y. Hu, C.W. Law, W. Shi, G.K. Smyth, limma powers differential expression analyses for RNA-sequencing and microarray studies, Nucleic Acids Res. 43 (2015) e47. https://doi.org/10.1093/nar/gkv007.
